# Supplementary material for: Genome-wide transcriptome profile of rice hybrids with and without Oryza rufipogon introgression reveals candidate genes for yield
Source: PubMed Central journal article supplement (PMC7078188; doi:10.1038/s41598-020-60922-6), 2020-03-17
Supplement: 41598_2020_60922_MOESM10_ESM.pdf [file 41598_2020_60922_MOESM10_ESM.pdf]

**Genome-wide transcriptome profile of rice hybrids with and without *Oryza rufipogon* introgression reveals candidate genes for yield**

G. Haritha<sup>1</sup>, T. Shashi Rekha<sup>2</sup>, A. Surekha<sup>1</sup>, S. K. Mangrauthia<sup>1</sup>, R. Rajeshwari<sup>2</sup>, N. Sarla<sup>1\*</sup>

<sup>1</sup>*ICAR-Indian Institute of Rice Research, Hyderabad 500 030, India*

<sup>2</sup>*CSIR-Centre for Cellular and Molecular Biology, Hyderabad 500 007, India*

**\*Corresponding author**

N. Sarla

ICAR-National Professor

Biotechnology

ICAR - Indian Institute of Rice Research (IIRR)

Rajendranagar, Hyderabad-500 030, India.

Tel.: +91 40 24591225

Fax: +91 40 24591217

E-mail: sarla\_neelamraju@yahoo.com

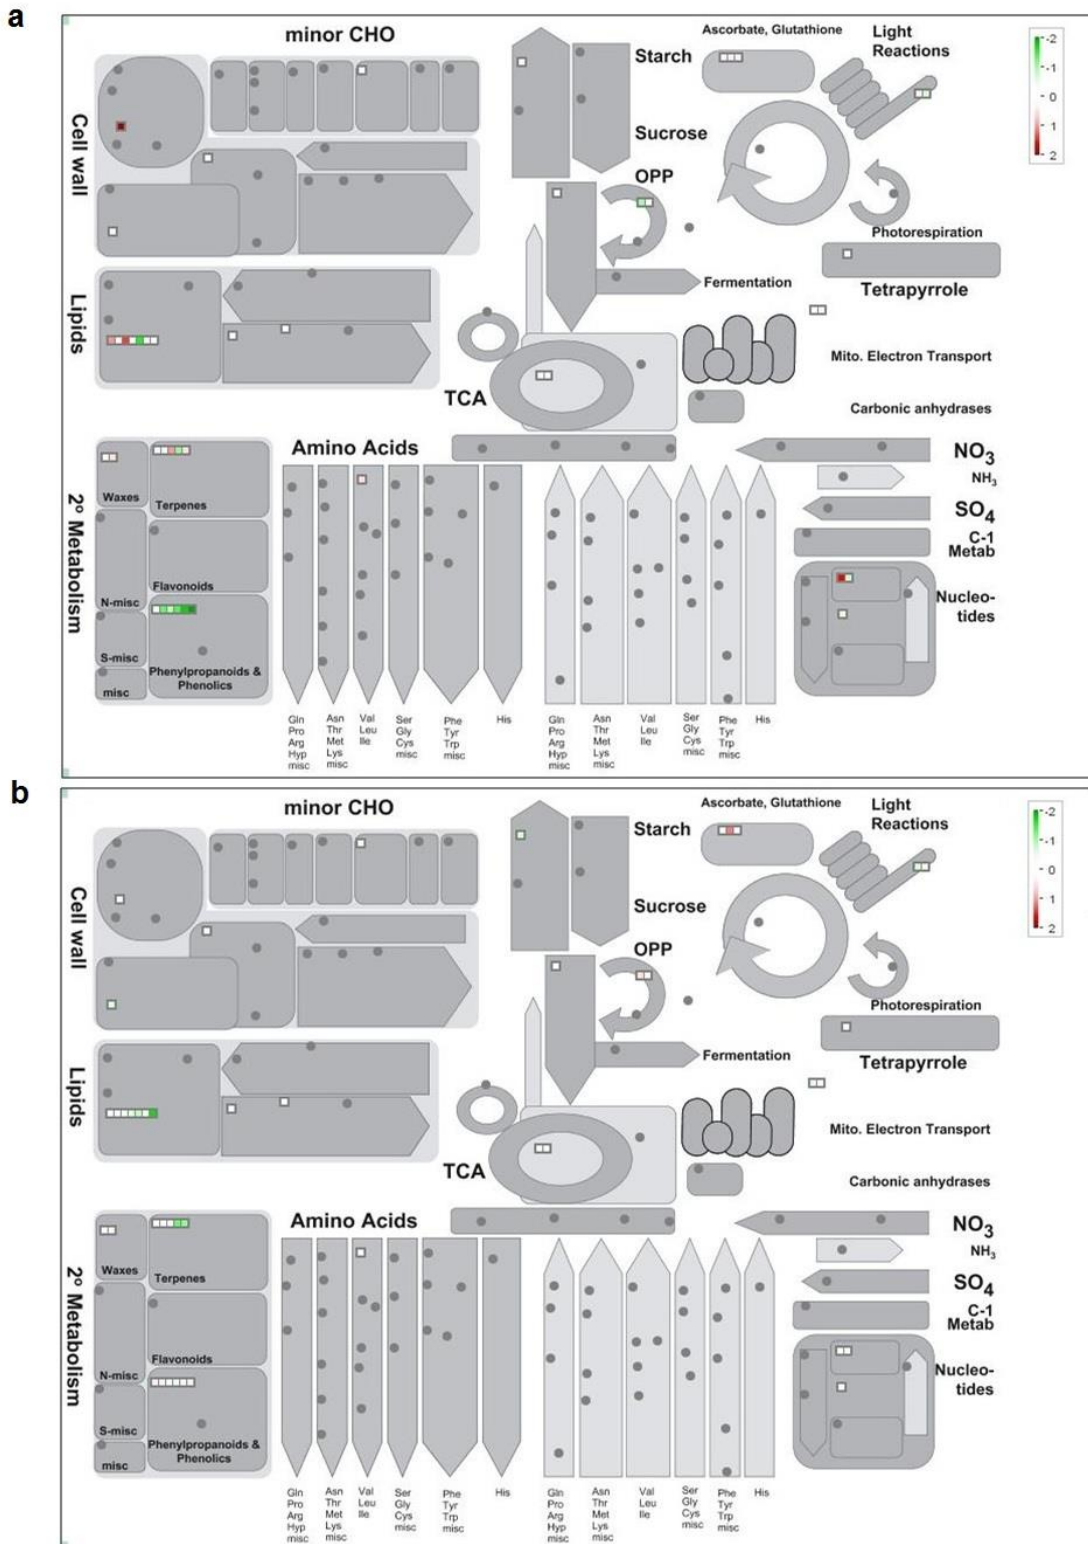

**Figure S1.** Metabolism overview of the differentially expressed genes within the yield QTL *qyld2.1* of test hybrid (a) Mapman overview of flag leaf (b) Mapman overview of panicle

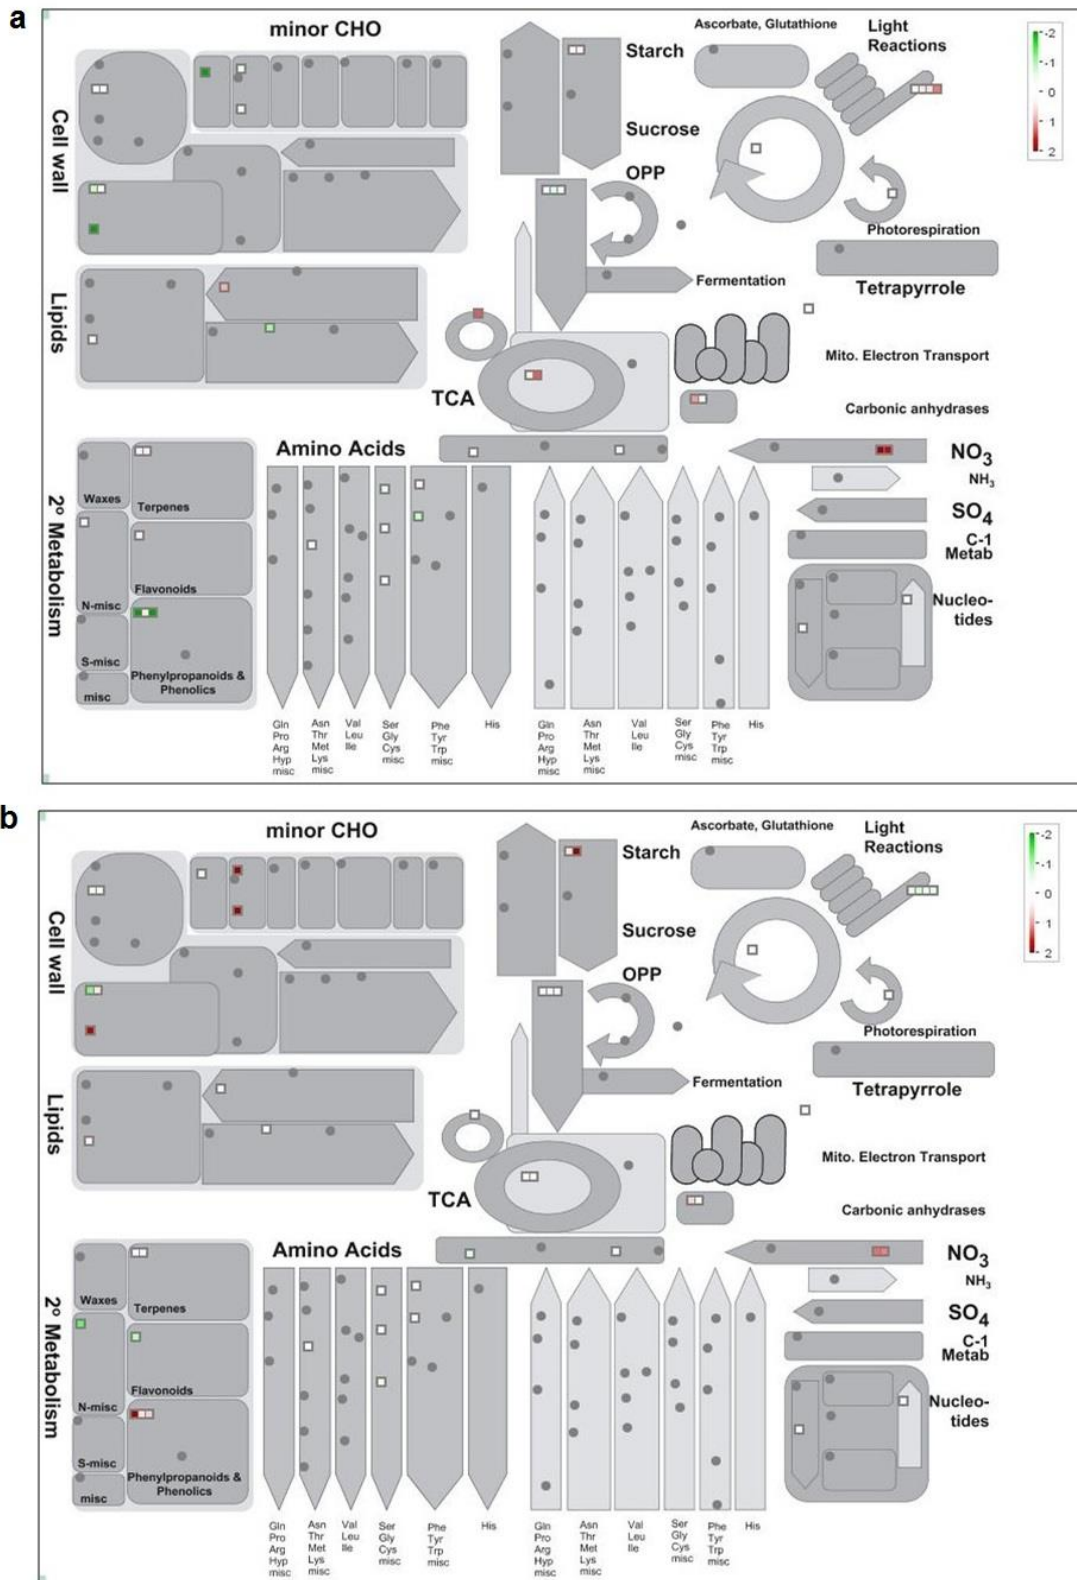

**Figure S2.** Metabolism overview of the differentially expressed genes within the yield QTL *qyld8.2* of test hybrid on chromosome 8 (a) Mapman overview of flag leaf (b) Mapman overview of panicle

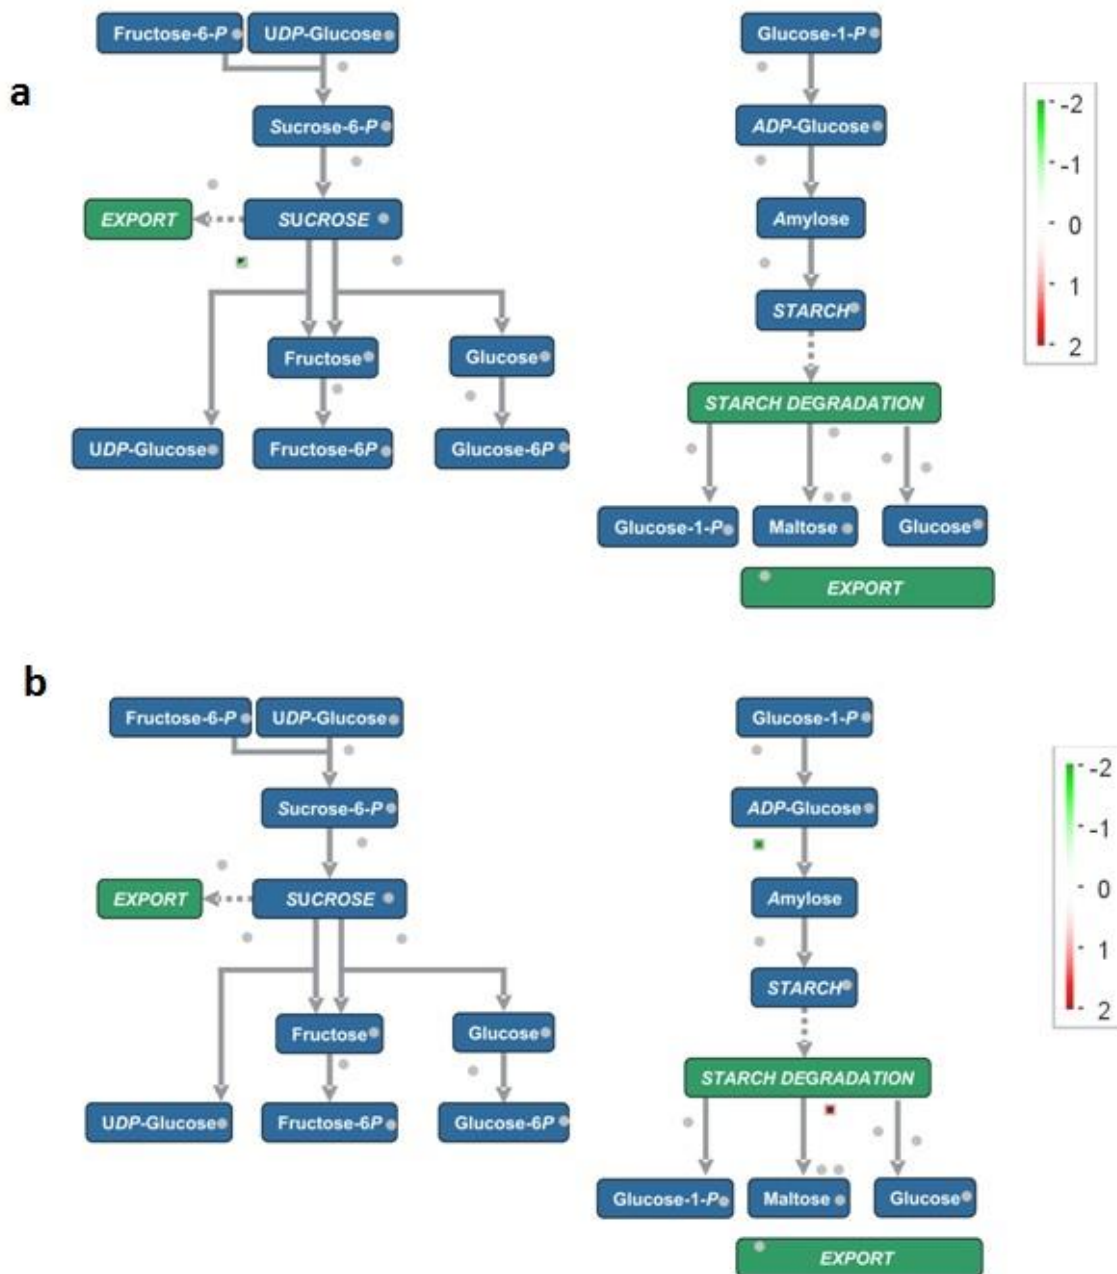

**Figure S3.** Major carbohydrate metabolism involves sucrose/starch degradation (a) flag leaf (b) panicle. The green squares represent the down- regulation and red squares represent the up-regulation of differentially expressed genes in test hybrid.

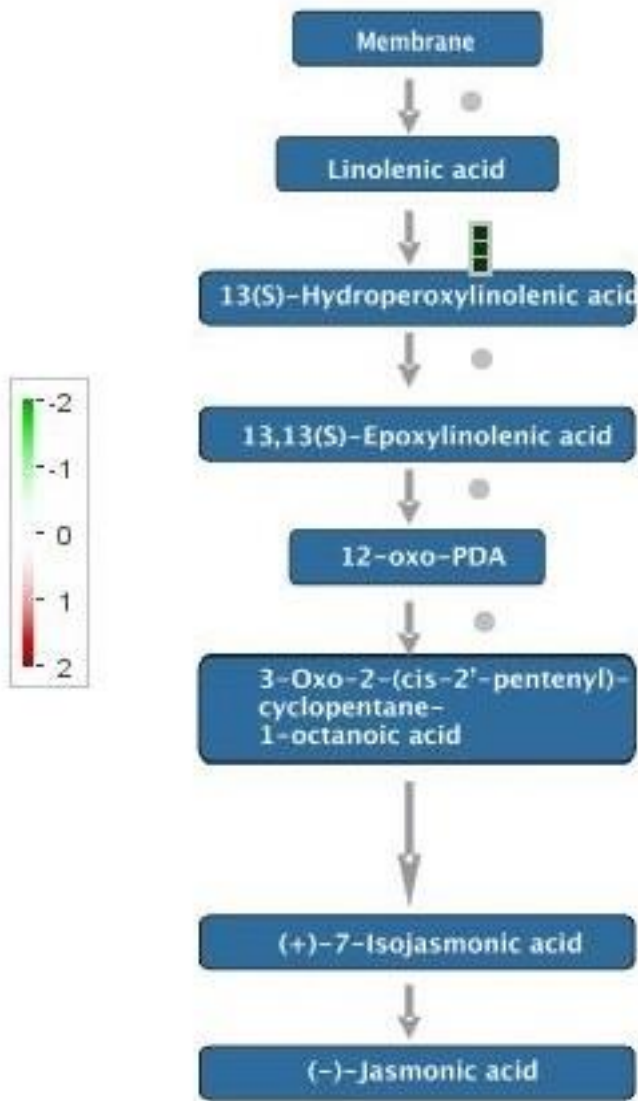

**Figure S4.** Bio synthesis of jasmonic acid (JA) from  $\alpha$ -linolenic acid. The green squares represent the down regulation in flag leaf of test hybrid.

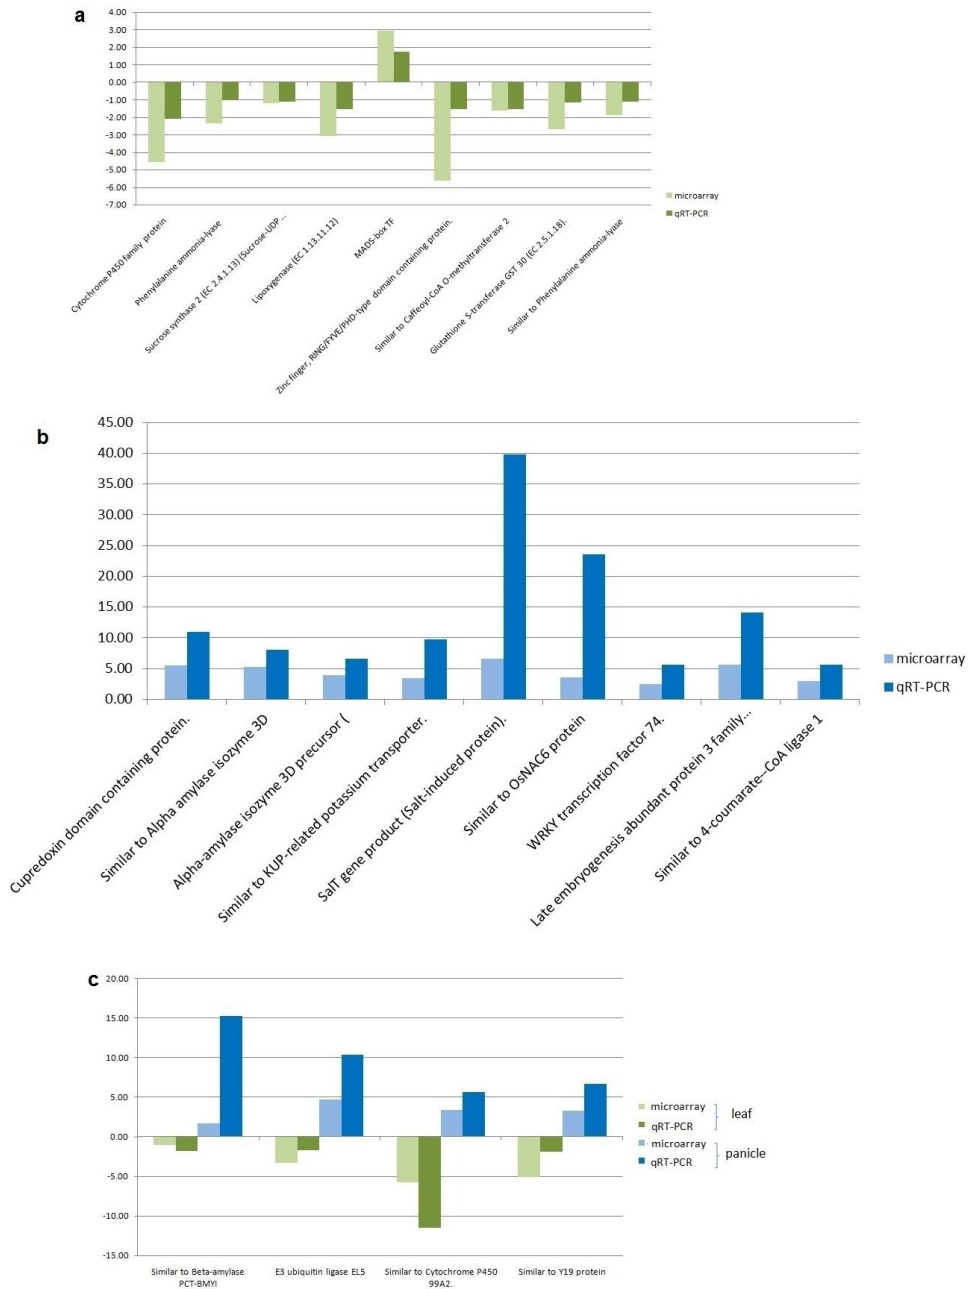

**Figure S5.** Expression profiles of DEGs in test hybrid as identified by microarray data were measured by qRT-PCR. The results of differences in gene expression from microarray and qRT-PCR were found to be consistent.

(a) qRT-PCR validation of differential expression of genes in flag leaf

(b) qRT-PCR validation of differential expression of genes in panicle

(c) qRT-PCR validation of differential expression of genes in both flag leaf and panicle



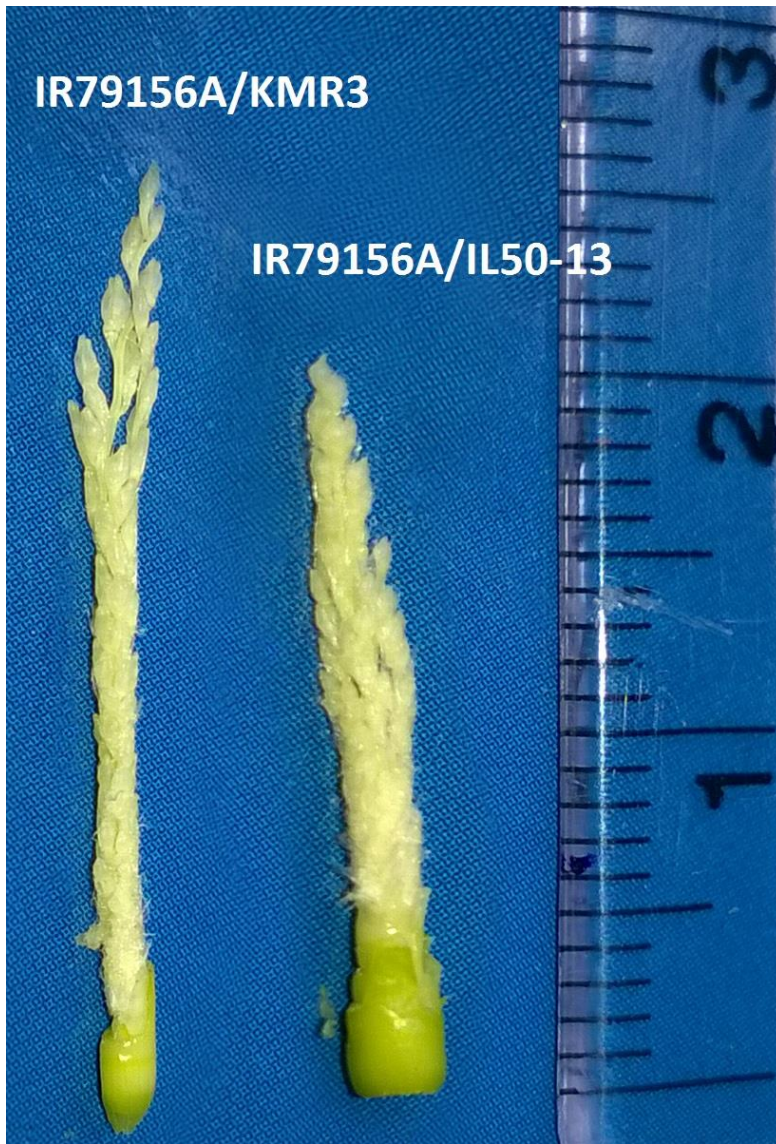

**Figure S6.** Young stage panicle <5cm in length used for transcriptome analysis

## Supplementary figure legends

**Figure S1.** Metabolism overview of the differentially expressed genes within the yield QTL *qyld2.1* of test hybrid (a) Mapman overview of flag leaf (b) Mapman overview of panicle

**Figure S2.** Metabolism overview of the differentially expressed genes within the yield QTL *qyld8.2* of test hybrid on chromosome 8 (a) Mapman overview of flag leaf (b) Mapman overview of panicle

**Figure S3.** Major carbohydrate metabolism involves sucrose/starch degradation (a) flag leaf (b) panicle. The green squares represent the down-regulation and red squares represent the up-regulation of differentially expressed genes in test hybrid.

**Figure S4.** Bio synthesis of jasmonic acid (JA) from  $\alpha$ -linolenic acid. The green squares represent the down regulation in flag leaf of test hybrid.

**Figure S5.** Expression profiles of DEGs in test hybrid as identified by microarray data were measured by qRT-PCR. The results of differences in gene expression from microarray and qRT-PCR were found to be consistent.

(a) qRT-PCR validation of differential expression of genes in flag leaf

(b) qRT-PCR validation of differential expression of genes in panicle

(c) qRT-PCR validation of differential expression of genes in both flag leaf and panicle

**Figure S6.** Young stage panicle <5cm in length used for transcriptome analysis



## Supplementary Tables

**Table S3.** DEGs and reported yield related genes considered for analysis to study the differences in the gene sequences between KMR3 and IL50-13. Category A refers to genes within *qyld2.1*, B refers to genes within *qyld8.2*, C refers to genes showing high fold expression and D refers to reported yield related genes

| S. No. | Category | Gene Name       | Chromosome | Start    | End      | Strand |
|--------|----------|-----------------|------------|----------|----------|--------|
| 1      | A1       | Os02t0552500-00 | chr02      | 20836392 | 20838251 | +      |
| 2      | A2       | Os02t0552700-01 | chr02      | 20846435 | 20847993 | +      |
| 3      | A3       | Os02t0555300-01 | chr02      | 20972825 | 20973948 | +      |
| 4      | A4       | Os02t0555600-02 | chr02      | 20989673 | 20994224 | +      |
| 5      | A5       | Os02t0559800-01 | chr02      | 21250083 | 21251343 | -      |
| 6      | A6       | Os02t0562600-01 | chr02      | 21330472 | 21335235 | -      |
| 7      | A7       | Os02t0563000-00 | chr02      | 21365479 | 21366789 | +      |
| 8      | A8       | Os02t0565600-01 | chr02      | 21487610 | 21489894 | -      |
| 9      | A9       | Os02t0568600-00 | chr02      | 21625022 | 21625725 | +      |
| 10     | A10      | Os02t0569400-02 | chr02      | 21690803 | 21692185 | +      |
| 11     | A11      | Os02t0569800-00 | chr02      | 21734265 | 21738288 | +      |
| 12     | A12      | Os02t0569900-01 | chr02      | 21740304 | 21741960 | +      |
| 13     | A13      | Os02t0570700-01 | chr02      | 21810375 | 21813457 | -      |
| 14     | A14      | Os02t0571800-00 | chr02      | 21886504 | 21897686 | -      |
| 15     | A15      | Os02t0572300-00 | chr02      | 21922917 | 21926203 | -      |
| 16     | A16      | Os02t0574800-01 | chr02      | 22057873 | 22058611 | +      |
| 17     | A17      | Os02t0575000-01 | chr02      | 22064966 | 22065592 | -      |
| 18     | A18      | Os02t0576600-01 | chr02      | 22146429 | 22150147 | -      |
| 19     | A19      | Os02t0578333-00 | chr02      | 22232078 | 22232549 | +      |
| 20     | A20      | Os02t0579600-00 | chr02      | 22294657 | 22301807 | +      |
| 21     | A21      | Os02t0579800-01 | chr02      | 22311834 | 22313012 | -      |
| 22     | A22      | Os02t0580300-02 | chr02      | 22333316 | 22337414 | +      |
| 23     | A23      | Os02t0580900-02 | chr02      | 22369985 | 22371481 | -      |
| 24     | A24      | Os02t0581400-02 | chr02      | 22421879 | 22426149 | +      |
| 25     | A25      | Os02t0583700-00 | chr02      | 22509550 | 22510620 | -      |
| 26     | A26      | Os02t0583900-01 | chr02      | 22514865 | 22515484 | -      |
| 27     | A27      | Os02t0587300-00 | chr02      | 22636061 | 22636963 | +      |
| 28     | A28      | Os02t0589000-01 | chr02      | 22722799 | 22733189 | -      |
| 29     | A29      | Os02t0590400-02 | chr02      | 22805689 | 22808343 | -      |
| 30     | A30      | Os02t0590400-01 | chr02      | 22805733 | 22808493 | -      |
| 31     | A31      | Os02t0591000-01 | chr02      | 22836027 | 22838425 | +      |
| 32     | A32      | Os02t0592000-00 | chr02      | 22900707 | 22910523 | -      |
| 33     | A33      | Os02t0593600-01 | chr02      | 22978830 | 22981452 | +      |
| 34     | A34      | Os02t0594800-01 | chr02      | 23062855 | 23066544 | -      |
| 35     | A35      | Os02t0595100-01 | chr02      | 23083106 | 23086437 | -      |
| 36     | A36      | Os02t0596200-01 | chr02      | 23142111 | 23144293 | +      |
| 37     | A37      | Os02t0596300-01 | chr02      | 23152884 | 23154628 | -      |

|    |     |                 |       |          |          |   |
|----|-----|-----------------|-------|----------|----------|---|
| 38 | A38 | Os02t0600500-00 | chr02 | 23495000 | 23495287 | + |
| 39 | A39 | Os02t0603700-00 | chr02 | 23651854 | 23653184 | + |
| 40 | A40 | Os02t0604500-00 | chr02 | 23683321 | 23684394 | + |
| 41 | A41 | Os02t0605000-01 | chr02 | 23710890 | 23712446 | + |
| 42 | A42 | Os02t0606700-01 | chr02 | 23769400 | 23772793 | + |
| 43 | A43 | Os02t0608050-00 | chr02 | 23847120 | 23847452 | + |
| 44 | A44 | Os02t0609000-01 | chr02 | 23900438 | 23900923 | - |
| 45 | A45 | Os02t0611800-01 | chr02 | 24080704 | 24084615 | + |
| 46 | A46 | Os02t0612700-01 | chr02 | 24133183 | 24139373 | - |
| 47 | A47 | Os02t0613900-02 | chr02 | 24223305 | 24228713 | + |
| 48 | A48 | Os02t0613950-00 | chr02 | 24224668 | 24224973 | - |
| 49 | A49 | Os02t0616100-01 | chr02 | 24372806 | 24374394 | + |
| 50 | A50 | Os02t0616450-01 | chr02 | 24391737 | 24395742 | + |
| 51 | A51 | Os02t0616600-01 | chr02 | 24410357 | 24414084 | - |
| 52 | A52 | Os02t0617400-01 | chr02 | 24516374 | 24518168 | + |
| 53 | A53 | Os02t0618400-02 | chr02 | 24580457 | 24582527 | - |
| 54 | A54 | Os02t0618700-01 | chr02 | 24595175 | 24596966 | + |
| 55 | A55 | Os02t0619166-00 | chr02 | 24630717 | 24631478 | - |
| 56 | A56 | Os02t0620600-01 | chr02 | 24690884 | 24692736 | + |
| 57 | A57 | Os02t0620900-00 | chr02 | 24700974 | 24701678 | - |
| 58 | A58 | Os02t0623300-01 | chr02 | 24819271 | 24820066 | + |
| 59 | A59 | Os02t0624300-01 | chr02 | 24878777 | 24879932 | - |
| 60 | A60 | Os02t0626100-01 | chr02 | 24973450 | 24977287 | - |
| 61 | A61 | Os02t0626400-03 | chr02 | 24985256 | 24986844 | - |
| 62 | A62 | Os02t0626400-01 | chr02 | 24985294 | 24989388 | - |
| 63 | A63 | Os02t0627100-01 | chr02 | 25006495 | 25009018 | - |
| 64 | A64 | Os02t0629000-01 | chr02 | 25153298 | 25154265 | - |
| 65 | A65 | Os02t0629400-01 | chr02 | 25176174 | 25179701 | - |
| 66 | A66 | Os02t0629900-01 | chr02 | 25191799 | 25193194 | - |
| 67 | A67 | Os02t0630100-00 | chr02 | 25194429 | 25196895 | - |
| 68 | A68 | Os02t0630300-02 | chr02 | 25199505 | 25202158 | - |
| 69 | A69 | Os02t0631700-01 | chr02 | 25286967 | 25287842 | - |
| 70 | A70 | Os02t0632900-00 | chr02 | 25356937 | 25360011 | - |
| 71 | A71 | Os02t0635600-01 | chr02 | 25488084 | 25491732 | + |
| 72 | A72 | Os02t0638650-01 | chr02 | 25595575 | 25597607 | - |
| 73 | A73 | Os02t0639800-05 | chr02 | 25671552 | 25673590 | - |
| 74 | A74 | Os02t0639800-02 | chr02 | 25671614 | 25677225 | - |
| 75 | A75 | Os02t0639800-04 | chr02 | 25672275 | 25675323 | - |
| 76 | A76 | Os02t0640300-01 | chr02 | 25696949 | 25698399 | - |
| 77 | A77 | Os02t0640401-00 | chr02 | 25698500 | 25698889 | + |
| 78 | A78 | Os02t0643800-01 | chr02 | 25878905 | 25879875 | + |
| 79 | B1  | Os08t0458532-00 | chr08 | 22477005 | 22479169 | - |
| 80 | B2  | Os08t0459700-00 | chr08 | 22553089 | 22554026 | - |
| 81 | B3  | Os08t0462900-01 | chr08 | 22715246 | 22716410 | - |
| 82 | B4  | Os08t0466200-01 | chr08 | 22904756 | 22908287 | + |
| 83 | B5  | Os08t0467100-01 | chr08 | 22971625 | 22974903 | + |
| 84 | B6  | Os08t0468100-01 | chr08 | 23033230 | 23038506 | + |

|     |     |                 |       |          |          |   |
|-----|-----|-----------------|-------|----------|----------|---|
| 85  | B7  | Os08t0468100-02 | chr08 | 23033973 | 23038463 | + |
| 86  | B8  | Os08t0468100-03 | chr08 | 23036533 | 23038585 | + |
| 87  | B9  | Os08t0469300-00 | chr08 | 23075194 | 23075610 | + |
| 88  | B10 | Os08t0473900-01 | chr08 | 23341289 | 23343273 | + |
| 89  | B11 | Os08t0473900-03 | chr08 | 23341357 | 23343240 | + |
| 90  | B12 | Os08t0474000-01 | chr08 | 23353856 | 23354936 | + |
| 91  | B13 | Os08t0474866-00 | chr08 | 23403049 | 23404168 | - |
| 92  | B14 | Os08t0476300-02 | chr08 | 23464000 | 23468392 | + |
| 93  | B15 | Os08t0476600-00 | chr08 | 23475471 | 23476235 | + |
| 94  | B16 | Os08t0478000-01 | chr08 | 23575567 | 23576307 | + |
| 95  | B17 | Os08t0481000-02 | chr08 | 23755951 | 23763739 | - |
| 96  | B18 | Os08t0482600-01 | chr08 | 23853339 | 23854314 | - |
| 97  | B19 | Os08t0483400-00 | chr08 | 23881968 | 23882372 | + |
| 98  | B20 | Os08t0485800-01 | chr08 | 24020865 | 24022693 | - |
| 99  | B21 | Os08t0487301-00 | chr08 | 24109853 | 24110337 | + |
| 100 | B22 | Os08t0489300-03 | chr08 | 24186673 | 24189314 | + |
| 101 | B23 | Os08t0490100-01 | chr08 | 24232676 | 24233936 | + |
| 102 | B24 | Os08t0490400-00 | chr08 | 24245038 | 24245636 | + |
| 103 | B25 | Os08t0491300-00 | chr08 | 24279068 | 24280669 | - |
| 104 | C1  | Os01t0314800-01 | chr01 | 11863682 | 11864412 | - |
| 105 | C2  | Os01t0348900-01 | chr01 | 13903285 | 13904626 | - |
| 106 | C3  | Os01t0348900-02 | chr01 | 13903285 | 13904626 |   |
| 107 | C4  | Os02t0831500-01 | chr02 | 35754946 | 35761216 | + |
| 108 | C5  | Os03t0401300-01 | chr03 | 16301279 | 16306089 | - |
| 109 | C6  | Os03t0401300-02 | chr03 | 16301374 | 16302930 | - |
| 110 | C7  | Os03t0753100-01 | chr03 | 31048351 | 31055017 | - |
| 111 | C8  | Os03t0815100-01 | chr03 | 34166100 | 34167521 | + |
| 112 | C9  | Os04t0180400-01 | chr04 | 5484865  | 5486703  | + |
| 113 | C10 | Os06t0229800-01 | chr06 | 6748398  | 6753302  | + |
| 114 | C11 | Os09t0334500-01 | chr09 | 10128837 | 10131086 | + |
| 115 | C12 | Os10t0531400-01 | chr10 | 20645931 | 20646880 | + |
| 116 | D1  | Os01t0831000-01 | chr01 | 35558148 | 35559225 | + |
| 117 | D2  | Os01t0746400-00 | chr01 | 31225458 | 31228566 | - |
| 118 | D3  | Os01t0197700-01 | chr01 | 5270449  | 5275585  | - |
| 119 | D4  | Os01t0879500-01 | chr01 | 38157319 | 38159782 | + |
| 120 | D5  | Os02t0244100-01 | chr02 | 8115223  | 8121651  | + |
| 121 | D6  | Os03t0407400-00 | chr03 | 16729501 | 16735109 | - |
| 122 | D7  | Os03t0753100-01 | chr03 | 31048351 | 31055017 | - |
| 123 | D8  | Os03t0117900-01 | chr03 | 978816   | 979770   | + |
| 124 | D9  | Os04t0413500-01 | chr04 | 20422171 | 20426921 | + |
| 125 | D10 | Os04t0615000-01 | chr04 | 31212165 | 31214739 | - |
| 126 | D11 | Os04t0396500-00 | chr04 | 19563794 | 19576451 | - |
| 127 | D12 | Os05t0158500-01 | chr05 | 3439304  | 3443769  | - |
| 128 | D13 | Os06t0677000-00 | chr06 | 28109236 | 28111005 | - |
| 129 | D14 | Os06t0665400-01 | chr06 | 27480082 | 27481453 | - |
| 130 | D15 | Os06t0610300-01 | chr06 | 24312470 | 24313095 | + |
| 131 | D16 | Os07t0616000-01 | chr07 | 25381698 | 25389532 | + |

|     |     |                 |       |          |          |   |
|-----|-----|-----------------|-------|----------|----------|---|
| 132 | D17 | Os07t0261200-01 | chr07 | 9152377  | 9155030  | - |
| 133 | D18 | Os07t0669500-01 | chr07 | 28299602 | 28301089 | - |
| 134 | D19 | Os08t0509600-01 | chr08 | 25274541 | 25278696 | - |
| 135 | D20 | Os09t0441900-01 | chr09 | 16411151 | 16415851 | + |
| 136 | D21 | Os11t0235200-01 | chr11 | 7193230  | 7198486  | - |

**Table S11.** Sequences of the 19 genes showing differences between KMR3 and IL 50-13.

5'UTR sequences are highlighted in blue gray color.  
 CDS (exon) sequences are highlighted in yellow color.  
 3'UTR sequences are highlighted in orange color.  
 SNPs are highlighted in light cyan color and InDels are highlighted in light green color.

**S.No: 1**

**A28: Os02t0589000-01**

**Query: KMR3: scaffold9446\_size10065**

**Subject: IL50-13: scaffold14856\_size6220**

| Score           | Expect                                                        | Identities     | Gaps        | Strand    |      |
|-----------------|---------------------------------------------------------------|----------------|-------------|-----------|------|
| 1502 bits (813) | 0.0                                                           | 831/844 (98%)  | 3/844 (0%)  | Plus/Plus |      |
| Query 1757      | TTTCAAATAATACACTATTTTAAAATAAAGTTTACACA                        | ----           | ANNNNNNNNNN | ATATCAAA  | 1813 |
| Sbjct 1         | TTTCAAATAATACACTATTTTAAAATAAAGTTTACACA                        | ATTATATTGTGTAC |             | ATATCAAA  | 60   |
| Query 1814      | TAAACAATTTAAGATCTATATTAAC TAATTTATACGTGTACTTAAACAAATGGACCCATT |                |             |           | 1873 |
| Sbjct 61        | TAAACAATTTAAGATCTATATTAAC TAATTTATACGTGTACTTAAACAAATGGACCCATT |                |             |           | 120  |
| Query 1874      | ATTTAAATTATCGGATCTATTTTTTATTACTTTGGACTATTATTCTCAAATAATGCATTG  |                |             |           | 1933 |
| Sbjct 121       | ATTTAAATTATCGGATCTATTTTTTATTACTTTGGACTATTATTCTCAAATAATGCATTG  |                |             |           | 180  |
| Query 1934      | TTTTAAAATAAAGTCTACACCATCATATCGTGTACCCATTAAATTAACAATTTAAatata  |                |             |           | 1993 |
| Sbjct 181       | TTTTAAAATAAAGTCTACACCATCATATCGTGTACCCATTAAATTAACAATTTAAATATA  |                |             |           | 240  |
| Query 1994      | tatatatatatatatataAAACTAATTATATTTACACTAGAACTGGTGGACCCATTATTT  |                |             |           | 2053 |
| Sbjct 241       | TATATATATATATATATAAAACTAATTATATTTACACTAGAACTGGTGGACCCATTATTT  |                |             |           | 300  |
| Query 2054      | AAATCAACAGATCTATTGTTAATAACTAAAGTGTTCAAAGTTCTCTTTTTGCCCGCTACA  |                |             |           | 2113 |
| Sbjct 301       | AAATCAACAGATCTATTGTTAATAACTAAAGTGTTCAAAGTTCTCTTTTTGCCCGCTACA  |                |             |           | 360  |
| Query 2114      | CAATACACATTTGCACCTTTGCCTTTTCGCACGTGCGACAAAGCATCGTGTCTGAGGCATC |                |             |           | 2173 |
| Sbjct 361       | CAATACACATTTGCACCTTTGCCTTTTCGCACGTGCGACAAAGCATCGTGTCTGAGGCATC |                |             |           | 420  |
| Query 2174      | TTAGGTGATCACGACCGCTGCAACGCTACCGCTTTTGTCAATAACATGAAAATAAAATTA  |                |             |           | 2233 |

```

Sbjct 421      ||||||||||||||||||||||||||||||||||||||||||||||||||||||||||| 480
                TTAGGTGATCACGACCGCTGCAACGCTACCGCTTTTGTCAATAACATGAAAATAAAATTA

Query 2234  AAGGTGTGTTGCAGCGAGAGAAGAATTAAGCACTATAGGAACACTTAGCTCTGTTTAAGC 2293
                |||||||||||||||||||||||||||||||||||||||||||||||||||||||||||
Sbjct 481      AAGGTGTGTTGCAGCGAGAGAAGAATTAAGCACTATAGGAACACTTAGCTCTGTTTAAGC 540

Query 2294  TGAAATCGAGAGATGATTACATAATAATTATAATGTATTGTGTTATGTTGTATTTGGATT 2353
                |||||||||||||||||||||||||||||||||||||||||||||||||||||||||||
Sbjct 541      TGAAATCGAGAGATGATTACATAATAATTATAATGTATTGTGTTATGTTGTATTTGGATT 600

Query 2354  TTGTATTATTTGTTTCGTACAGTTGAAAGAAATCATTATGATATAAATTTGAGTACAATAT 2413
                |||||||||||||||||||||||||||||||||||||||||||||||||||||||||||
Sbjct 601      TTGTATTATTTGTTTCGTACAGTTGAAAGAAATCATTATGATATAAATTTGAGTACAATAT 660

Query 2414  TAACATATATTAATAGAATTCTTAATAGGACAAGAGTGTTATAAGGGAGTTTAAGGCTCT 2473
                |||||||||||||||||||||||||||||||||||||||||||||||||||||||||||
Sbjct 661      TAACATATATTAATAGAATTCTTAATAGGACAAGAGTGTTATAAGGGAGTTTAAGGCTCT 720

Query 2474  ATTCTTTTGGATTTTCGTTTGCACGCTCCACGCTTTCCAAGTTCCTAAATGGTGAttttt 2533
                |||||||||||||||||||||||||||||||||||||||||||||||||||||||||||
Sbjct 721      ATTCTTTTGGATTTTCGTTTGCACGCTCCACGCTTTCCAAGTTCCTAAATGGTGATTTTT 780

Query 2534  ttaaacaactttttaactttttAGAAGTTAATTCATTCGTTTATAATCTCAAATAGCTAT 2593
                |||||||||||||||||||||||||||||||||||||||||||||||||||||||||||
Sbjct 781      TTAAACAAC TTTTAACTTTT TAGAAGTTAATTCATTCGTTTATAATCTCAAATAGCTAT 840

Query 2594  CACA 2597
                ||||
Sbjct 841  CACA 844

```

**Table of SNPs and InDels in Os02t0589000-01**

|                    | cds | 5' UTR | 3'UTR | Introns |
|--------------------|-----|--------|-------|---------|
| No. of variants:13 | 0   | 0      | 0     | 13      |
| No. of SNPs: 10    | 0   | 0      | 0     | 10      |
| No.of InDels: 3    | 0   | 0      | 0     | 3       |



**S.No: 2**

**A61: Os02t0626400-03**

**Query: KMR3: scaffold13385\_size7025**

**Subject: IL50-13: scaffold12144\_size7524**

| Score            | Expect                     | Identities               | Gaps                   | Strand       |      |
|------------------|----------------------------|--------------------------|------------------------|--------------|------|
| 1862 bits (1008) | 0.0                        | 1181/1267 (93%)          | 2/1267 (0%)            | Plus/Minus   |      |
| Query 1          | AAGCCGGAGTACACCGACCACCTC   | ACCCACAAGCTGAAGCACCACCC  | GGGGCAGATCGAG          | 60           |      |
| Sbjct 1266       | AAGCCGGAGTACACCGACCACCTG   | ACCCACAAGCTGAAGCACCACCC  | TGGACAGATCGAG          | 1207         |      |
| Query 61         | GCGGCCGCCATCATGGAGCACATCTT | GGAAGGCAGCTCGTACATGAAGG  | GAGGCGAAGAGG           | 120          |      |
| Sbjct 1206       | GCTGCTGCCATCATGGAGCACATCTT | CAAGGCAGCTCGTACATGAAGCT  | TGGCGAAGAAG            | 1147         |      |
| Query 121        | CTCGGC                     | GAGCTCGACCCGCTGATGAAGCC  | GAAGCAGGACAGGTACGCGCT  | CCCGACGTGC   | 180  |
| Sbjct 1146       | CTCGGT                     | GAGCTCGACCCGTTGATGAAGCC  | GAAGCAAGACCGGTACGCGCT  | CCCGACGTGC   | 1087 |
| Query 181        | CCGCA                      | TGGCTTGGCCCTCAGATCGAAGTT | TATTCGTGCGGCCACCAAGTCC | ATTGAGCGC    | 240  |
| Sbjct 1086       | CCGCA                      | TGGCTTGGCCCTCAGATCGAAGTT | TATTCGTGCGGCCACCAAGTCC | ATTGAGCGC    | 1027 |
| Query 241        | GAGATCAACTTC               | GTCAACGACAACCCGCTCATCGAC | GTCTCCCGCGGAAGGCGCT    | TGCAC        | 300  |
| Sbjct 1026       | GAGATCAACTTC               | GTCAATGACAACCCACTCATTGAT | GTCTCCCGCGACAAGGCGCT   | TTCAT        | 967  |
| Query 301        | GGCGG                      | CAACTTCCAGGGCACCCCATCGG  | CGTGTCATGGACAACACCCGC  | CCTCGCCATC   | 360  |
| Sbjct 966        | GGTGG                      | TAACTTCCAGGGCACTCCCATCGG | TGTGTCATGGACAACACTCGC  | CCTCGCAATT   | 907  |
| Query 361        | GCCGCCATCGG                | GAAGCTCATGTTGCGCAGTTCTC  | CGAGCTGGTGAACGACTTCT   | TACAAC       | 420  |
| Sbjct 906        | GCTGCCATCGG                | GAAGCTCATGTTGCGCAGTTCTC  | AGAGCTTGTGAACGACTACT   | TACAAC       | 847  |
| Query 421        | AACGGCCT                   | TGCCCTCCAACCTCTCCGCGGG   | CCGCAACCCGAGCTTGGACT   | TACGGCTTCAAG | 480  |
| Sbjct 846        | AACGGCCT                   | TGCCCTCCAACCTGTCCGCGGG   | CCGCAACCCGAGCTTGGAT    | TACGGCTTCAAG | 787  |
| Query 481        | GGCGCCGAGATCGCCATGGC       | GTCTACTGCTCCGAGCTGCAGTT  | TCTTGGGCAACCCGGTG      | 540          |      |
| Sbjct 786        | GGCGCCGAGATCGCCATGGC       | TCTACTGCTCCGAGCTGCAGTT   | TCTTGGGAAACCCAGTG      | 727          |      |



**Table of SNPs and InDels in Os02t0626400-03**

|                    | cds | 5' UTR | 3'UTR | Introns |
|--------------------|-----|--------|-------|---------|
| No. of variants:86 | 86  | 0      | 0     | 0       |
| No. of SNPs: 84    | 84  | 0      | 0     | 0       |
| No.of InDels: 2    | 2   | 0      | 0     | 0       |

**S.No: 3**

**A11: Os02t0569800-00**

**Query: KMR3: scaffold2303\_size25555**

**Subject: IL50-13: scaffold17631\_size5156**

| Score            | Expect                                                         | Identities      | Gaps         | Strand    |
|------------------|----------------------------------------------------------------|-----------------|--------------|-----------|
| 2510 bits (1359) | 0.0                                                            | 1594/1712 (93%) | 18/1712 (1%) | Plus/Plus |
| Query 255        | ATAAAAATATTTTCAAGAACAAGATGAGCTAGCAGCTAATCATTTTGTAAAAATGGACATG  | 314             |              |           |
| Sbjct 10         | ATAATCTATTTTCAAGAACAAGATGAGCAAGCAGCTAATCATTTTGTAAAA---GAGATG   | 66              |              |           |
| Query 315        | CAGAGATTCTTTATTTTTTGTGTGGATATGAATTGAATGAAGGTAATATTAATATCTTAT   | 374             |              |           |
| Sbjct 67         | CAGAGATTCTTTATTTTTTGTGTGGATATGAATTGAATGAAGGTAATATTAATATCTTAT   | 126             |              |           |
| Query 375        | TGATGTTCCATAAAAATGTAGTGCCAAATTGTCGTACAAATGAAAACATTTTTTGATATGA  | 434             |              |           |
| Sbjct 127        | TGATGTTCCATAAAAATGTAGTGCCAAATTGTCGTACAAATGAATACATTTTTTGATATAA  | 186             |              |           |
| Query 435        | GGCGGCATGGTGTGGAGGCGTAGGTCAACATGAGTACAATAGTCTGCCCACTATATGTTC   | 494             |              |           |
| Sbjct 187        | GGCGGCATGGTGTGGAGGCGTAGGTCAACATGAGTACAATAGTCTGCCCACTATATGTTC   | 246             |              |           |
| Query 495        | ATTATAGTGTTTTGCCTTGATAAGAAATGTTGACCATGCTGACCATTTATTGCTTTTTTGC  | 554             |              |           |
| Sbjct 247        | ATTATAGTGTTTTGCCTTGATAAGAGATTTTGACCATGCTGACCATTTATTGCTTTTTTAC  | 306             |              |           |
| Query 555        | AGGCATCTGATTTCTCGGTGATCAAGGATGGAGGTGAGGAACTTCAACGAGAAGCTGGTT   | 614             |              |           |
| Sbjct 307        | AGGCATCTGATTTCTCGGTAATCAAGTATGGAGGTGAGGAACTTTAACGAGAAGCTGGTT   | 366             |              |           |
| Query 615        | GAATAAAATTTCTACCTTATTACTGAGGTACATGGCCATACATTGCTATGTCGATCGTTA   | 674             |              |           |
| Sbjct 367        | GAATAAAATTTCTACCTTATTACTGAGGTACATTTCCATACATTGCTATGTCGATAGTTA   | 426             |              |           |
| Query 675        | TTAGTGAAGGGGGTGCTACAAGCACTTTGTTTTCTTCTTTGTGATGAATTTGATATTGTT   | 734             |              |           |
| Sbjct 427        | TTAGTGAAGGGGGTGCTACAAGCACTTTGTTTTCTTCTTTGTGATGAATTTGATATTGTT   | 486             |              |           |
| Query 735        | CCCCCAATACTTAGGTAAACAAGGGCGTGTACTTGTGCTTCTTCTAAAACCTAATGAAT    | 794             |              |           |
| Sbjct 487        | CT---CCAATACTTAGGTAAACAAGGGCGTGTACTTGTGCTTCTTCTGAAAACCTAATGAAT | 544             |              |           |

|       |      |                                                               |      |
|-------|------|---------------------------------------------------------------|------|
| Query | 795  | GGCTGCCTCCACTGCTTGTGGTaaaaaaaaCTCTTAGTTGTTGCTTTATAaaaaaaT     | 854  |
|       |      |                                                               |      |
| Sbjct | 545  | GGCTGCCTCCACTGCTTGTGGTAAAAAACTCTTAGTTGTTGCTTTATAAAAT--AAAT    | 602  |
| Query | 855  | CTATGTTGCCATCGATTCCTTTGCTGTCATGGTGAAAGGGCCAGCTAGCAAGAACAACACT | 914  |
|       |      |                                                               |      |
| Sbjct | 603  | CTATGTTGCCATCAATTC--TTGCTATCACGGTGAAAGGGCCGGCTATCAAGAACAACACT | 661  |
| Query | 915  | TACATAGATGTATTATACTCAAGATCCTTTCTGTGATTGTTTGAAAATTATATTCATGGTT | 974  |
|       |      |                                                               |      |
| Sbjct | 662  | TACATAGATGTACTATACTCAAGATCCTTTTGTGATTGTTTGAAAATTATATTCATGGTT  | 721  |
| Query | 975  | ATTATTTGACTTGATACTTATTTTCATGGTTTTAAACACATGCACTAAAATCAGCTTGGA  | 1034 |
|       |      |                                                               |      |
| Sbjct | 722  | ATTATTTAACTTGATTCCTTATTTTCATGGTTTTAAACACATGCACTAAAATCAGCTTGGA | 781  |
| Query | 1035 | GGAAATGGGATATAAGCAGGAGTTTATGTATCCAAAATATGTAATCAGACTCTGGGATATG | 1094 |
|       |      |                                                               |      |
| Sbjct | 782  | GTAATGGGATATAAGCAGGAGTTTATGTATCCAAAATATTTAATCAGACTCTGGGATATG  | 841  |
| Query | 1095 | CTGTAAATTTGAGCTGGTCTGCCTCTGTTAATGGGTTAAAAGTCATGGATGCTGGTGTTA  | 1154 |
|       |      |                                                               |      |
| Sbjct | 842  | CTGTAAATTTGAGCTGGTCTACCTCTGTTATGGGTTAAAAGTCATGGATGCTGGTGTTA   | 901  |
| Query | 1155 | GCCAGATGAAATAGCATCATTGCGCTCTACTGTATCAGGA--TTCCTTGAATCCTGGA    | 1211 |
|       |      |                                                               |      |
| Sbjct | 902  | GCCAGATGAAATAGCATCATTGCGCTCTACTGTATCAGGATTTTCCTTGAATCCTGGA    | 961  |
| Query | 1212 | TTTGCATTTTGTGGTTCCTCAAACAATTGTATCTGATGTTATAATCTGATATATC       | 1271 |
|       |      |                                                               |      |
| Sbjct | 962  | TTTGCATTTTGTGGTTCCTCAAACAATTGTGTCGATGTTATAATCTGATATATC        | 1021 |
| Query | 1272 | ATAGTTTGA-ACGTGATACACAGGTATAGTATAGTATAACCTGCAGTGCCAGATTTGGAC  | 1330 |
|       |      |                                                               |      |
| Sbjct | 1022 | ATAGTTTATCACGTGATACACAGGTATAGTATA--AG---CTGCAGTGCCAGATTTGGAC  | 1076 |
| Query | 1331 | ATCTTCAGTTATGGGACTTGATAAAGCTTGGAGATCATCTCGGTGAACGGGAGGATGTTG  | 1390 |
|       |      |                                                               |      |
| Sbjct | 1077 | ATCTTCAGTTGTTGGGACTTGATAAAGCTTGGAGATCATCTCGGTGAACGGGAGGATGTTG | 1136 |
| Query | 1391 | ATCCATGCAGTTGTCTGTTACCTGTGTTCTGTTATACAACTAATATGCAGTGATAGATG   | 1450 |
|       |      |                                                               |      |
| Sbjct | 1137 | ATCNNNNNNNNNNA-TGTTACCTGTGTTCTGTTATACAACTAATATGCAATGATAGATG   | 1195 |
| Query | 1451 | CACTATGGTATATCATCGTCAGATCTTCTTCAAAGTGGATGGTAGCTATCTGTGCAGAT   | 1510 |
|       |      |                                                               |      |
| Sbjct | 1196 | CACTGTAGTATATCATCGTCAGATCTTACTTCAAAGAGGATGGGAGCTATCTGTGCAGAT  | 1255 |
| Query | 1511 | AGGTTGACAAAAAATTGCAAGCCCATGTTTCAGATTTTCAAATCAATACATGTGCAAGTTT | 1570 |
|       |      |                                                               |      |
| Sbjct | 1256 | AGGTTGACAAAAAATTGCAAGCCCATGTTTCAGATTTTCAAATCAATACATGTGCAAGTTT | 1315 |

```

Query 1571 CAGACTATTAAAGTTCAGAGCGATTTATGCATGATATCACACATTACTAGCTTAATTTAT 1630
          |||
Sbjct 1316 AAGACTATTAAAGTCCAGAACATTTTATGTATGACATCACACATTACTAGCTTAATTTAT 1375

Query 1631 CTCAAACGCAGGCCCGCACAAGCCCAAGTTTTAGCTCAAACCATAAACTGCAAAT 1690
          |||
Sbjct 1376 CTCAAACGCAGGCCCGCACAAGCCCAAGTTTTAGATCAAACCATAAACTGCAAAT 1435

Query 1691 CTGTTTGCCATAACAATCTGACTATATTCTAATTGCATATTTTCTATAATTCGCTCACTAA 1750
          |||
Sbjct 1436 TTGTTTGCCATAACAATCTGACTATATTCTAATTGCATATTTTCTATAATTCGCTCCCAA 1495

Query 1751 ATGTAGTCTATTATCAATTTTAAATTCATTGTATATGTTTGGCAATTTAGATTGTCCAA 1810
          |||
Sbjct 1496 AGGCAATCTATTATTAATCAATTAATTCATTGTATATGCTTTGGCAATTTAGATTGTACAA 1555

Query 1811 TTCATAGTGTATAGTTGATTGATATCATTGAATGTTTTTAGAGTAACTATTATTGTAT 1870
          |||
Sbjct 1556 TTCATAGTGTATAGTTGATTGATATCATTGAATGTTTTGAGAGTAACTATTATTGTAA 1615

Query 1871 TCACAAATACATTTATAGAACAATAATGCATAAGTTTATTACGTTTTTCACGTTATTTAAG 1930
          |||
Sbjct 1616 TCACAAATATATTTACAGAACAATAATGCACAAGTTTATTATGTTTTTCATGTTATTTAAG 1675

Query 1931 ACCTGTTGCAACGCACGGGCATCGGACTAGTA 1962
          |||
Sbjct 1676 ACCCGTTGCAACGCACGGGCATCATACTAGTA 1707

```

**Table of SNPs and InDels in Os02t0569800-00**

|                     | cds | 5' UTR | 3'UTR | Introns |
|---------------------|-----|--------|-------|---------|
| No. of variants:118 | 4   | 0      | 0     | 114     |
| No. of SNPs: 100    | 4   | 0      | 0     | 96      |
| No.of InDels: 18    | 0   | 0      | 0     | 18      |



**S.No: 4**

**A51: Os02t0616600-01**

**Query: KMR3: scaffold15492\_size5752**

**Subject: IL5013: scaffold26405\_size2842**

Score 2756 bits (1492) Expect 0.0 Identities 1739/1862 (93%) Gaps 15/1862 (0%) Strand Plus/Plus

|       |     |                                                               |      |
|-------|-----|---------------------------------------------------------------|------|
| Query | 1   | AGTCAAATTTGGACATAAATTCATCTAAATTCAAACTCTTCATTTTGATATCAAATTTGC  | 60   |
|       |     |                                                               |      |
| Sbjct | 515 | AGTGAAACTTGGACCTAAATTCATCTAAATTCAAACTCTTCATTTTGATATCAAATTTGC  | 574  |
| Query | 61  | TATTTTAAGATTTTATTTGAATTTCTTAATTTATTCAAATACCATTTGAATAAATATTT   | 120  |
|       |     |                                                               |      |
| Sbjct | 575 | TATTTTAAGATTTTATTTGAATTTCTTAATTTATTCAAATACCATTTGAATAAATATTT   | 634  |
| Query | 121 | GATTTAATCTTATGATTGAATTTACAATTTAAACTTATATTTGCTTTCCAAATATTTTCT  | 180  |
|       |     |                                                               |      |
| Sbjct | 635 | GATTTAATCTTATAATTGAATTTACAATTTAAACTTATATTTGCTTTCCAAATATTTTCT  | 694  |
| Query | 181 | TTTATTTCCAAAATACCTTTAGCCACTAAAAAGCCGCCGG-----CTTTACACCTTCC    | 234  |
|       |     |                                                               |      |
| Sbjct | 695 | TTTATTTCCAAAATGCCTTTTAGCCACTAAAA-GCCGCCGGTTGGAACCTTTACGCCTTCC | 753  |
| Query | 235 | ATGGGGACGTTTGCCTGGTCTAGGGACCTCAACGTCAAACCGTTGTTGTAAAGCCCGGC   | 294  |
|       |     |                                                               |      |
| Sbjct | 754 | ATGGGGACATTCGCTGGTCTACGGACCTCAACGTCGGACCGTTGTTGTAAAGCCCGGC    | 813  |
| Query | 295 | AAAAACCAAACCTAAGGTCGAAGTGCTGCTCCTGGCACCCCACGCCTTGATGCGTACAGC  | 354  |
|       |     |                                                               |      |
| Sbjct | 814 | ATAAACCAAACCCAAGGTCGAAGTGCTGCTCCTGGCATCCCATGCCTTGATGCGTATAGC  | 873  |
| Query | 355 | GGTCGGAGCTTCACTATCCCCTCGACCTCCATTGCACGCCGCACAGTTAGCTCTTGAGCT  | 414  |
|       |     |                                                               |      |
| Sbjct | 874 | AGTCGGAGCTTCACTATCCCCTCGACCTCCATTGCACACCGCACAGTTAGCTCTCGGGCT  | 933  |
| Query | 415 | CTGTGTGATCCTAGCCGCTCTGCCGCCACTCACGGTTGACGGAGTAACACTTCCACCCCA  | 474  |
|       |     |                                                               |      |
| Sbjct | 934 | CTGTGTGATCCTAGCCGCTCGGCCGCCACTCACAGTTGTCGGAGTAACACTTCCACCCCA  | 993  |
| Query | 475 | CTAAAACCTGCACCCACCTCCTATTCTTCTAGCCGATATGTTGTCTATCAACACGGCTAGA | 534  |
|       |     |                                                               |      |
| Sbjct | 994 | CTAAACCTGCACCCACCTCCTATTCTTCTAGCCGATATGTTGTCTATCGACACGGCTAGA  | 1053 |



Query 1313 TAAGTTTACCAAGT GCTTATGTCAAATGAAAGAGTACGACC GCAGCTTCTAGAATGGGGA 1372  
 |||  
 Sbjct 1828 TAAGTTTACCAAGT ACTTATGTCAAACGAACGAGTACGACC ACAGCTTCTAGAACGGGGA 1887

Query 1373 CAGACCTAGATATTATGTTAATTAACAATGTGGTACCTCTGTACAGTGGTTCTTATGTAA 1432  
 |||  
 Sbjct 1888 CAGACCTAGATATTATGTTAATTAACAATGTGGTACCTCTGTACAGTGGTTCTTATGTAA 1947

Query 1433 GTCCTCGCGAAGGAGGCAAATATATGCTGAGCAGGGCAAATGTGATATTTACCGAGGCGC 1492  
 |||  
 Sbjct 1948 GTCCTCGCGAAGGAGGCAAATATATGCCGCGAAGGGCAAATGTGATATTTACCGAGGCGC 2007

Query 1493 ACATAAATATCTTGATTATCAGCGATGTTGTGTGATTTTATGGAAACCTGGTTGAGAT 1552  
 |||  
 Sbjct 2008 AGGTAAATATCTTGATTATCAGCGATGTTGTGTGAAATTTATGAAAACCTGGTTGAGAT 2067

Query 1553 GACGTGGGGTCTCTCCTCCAGTTCTCTCTAAAAACCTCGGGAAC TCCAGAACTCCTCTCG 1612  
 |||  
 Sbjct 2068 GACGTGGGGTCTCTCATCCTGTTCTCTCTAAAAACCCGGGAAC GCCAGAACTCCTCTCG 2127

Query 1613 CTGCTGATAACGTTACGTTTCAGAGCGCATGGGGACTAGAGTTCATGGAACAGGTGCCACA 1672  
 |||  
 Sbjct 2128 CTGCTGATAACGTTACATTCAAAGCGCATGGGGACTAGAGTTCATGGAACAGGTGTCACA 2187

Query 1673 ATTGTTAATAACTTAATACTGGGCCATGACTAAGCTAATGATTATTAGCAAGTTATGGAC 1732  
 |||  
 Sbjct 2188 ATTGTTAATAACCTAATACTGGGCCATGACTAAGCTAATCATTATTGGCAAGTCGTGGAC 2247

Query 1733 TGCGGGTAAAGCGTACATCTACTGCAGTATGAATATGTTTAAAACTATTTCGAATAGCCGT 1792  
 |||  
 Sbjct 2248 TGCGGGTAAAGCGTACATCTACTGCAGTATGAATATCCTTAAAACTATTTCGAATAGTCGT 2307

Query 1793 GCTCACGGATTTGAGCATCGGGACTGATATGGTACTTTGGTTAGAAATATAATTCAAGAT 1852  
 |||  
 Sbjct 2308 GCTCACGGATTTGAGCATCGGGACTCATATGGTACTTTGGTTAGAAATATAATTCAAGAT 2367

Query 1853 TT 1854  
 ||  
 Sbjct 2368 TT 2369

**Table of SNPs and InDels in Os02t0616600-01**

|                      | cds | 5' UTR | 3'UTR | Introns |
|----------------------|-----|--------|-------|---------|
| No. of variants: 123 | 0   | 0      | 6     | 117     |
| No. of SNPs: 108     | 0   | 0      | 5     | 103     |
| No. of InDels: 15    | 0   | 0      | 1     | 14      |

**S.No: 5**

**A32: Os02t0592000-00**

**Query: KMR3: scaffold8341\_size11245**

**Subject: IL5013: scaffold17585\_size5169**

| Score           | Expect                                                        | Identities      | Gaps         | Strand    |
|-----------------|---------------------------------------------------------------|-----------------|--------------|-----------|
| 1334 bits (722) | 0.0                                                           | 1194/1424 (84%) | 35/1424 (2%) | Plus/Plus |
| Query 1026      | CGCCGACTGGTGTTCATCACCATTGATAGACGATTTTATTCCACATCGGTACCTCT      | 1085            |              |           |
| Sbjct 1         | CGCCGACGGTGTTCATTGGCATTGATGGACGACTTTGTTCCCACATTGGCCACCTCT     | 60              |              |           |
| Query 1086      | GTCGTCACCGAGGGAAATATCAAAAAGCTAAGTCATCACAAAttttcttttttatatgat  | 1145            |              |           |
| Sbjct 61        | GCCATCACCAAGAGAAATATTACAAAGCTAAGTCATTATTAATTTTCTTCTTTATATGAT  | 120             |              |           |
| Query 1146      | attttcttttCCTCTGCCTCACTACGTCAACTGGTTCGTCATTGCCTACTGAGTTGGGG   | 1205            |              |           |
| Sbjct 121       | ATTTTCTTTTCTCTAACCCTACTACATCAATTGGTTCACCATTGACTAGTGAGTCGGGG   | 180             |              |           |
| Query 1206      | GCTACAGATGTTATATCATAACTTTTCAACAA-TTTTCATAATATTTATCTTGATTGCTC  | 1264            |              |           |
| Sbjct 181       | GCTATAGATGTTATGTCATA-TTTTTTAACAATTTTTCATAATATTTATCTTGATTGCTT  | 239             |              |           |
| Query 1265      | GCGACATAATCCGAGTACATAAGTGCCTATCGAGTTATGGAGTTCCATCTTCCTATGCTT  | 1324            |              |           |
| Sbjct 240       | GCGATATAATCTAAGTACAAAAGTGCCTATCGAGTTATGGAGTTCTATCTTCCTATGCTT  | 299             |              |           |
| Query 1325      | TCTGTTTGGTTTGCCAATGGATAGTTGCTTTTGGGCCATTCTTAGCACCCGGGGGCTCG   | 1384            |              |           |
| Sbjct 300       | TCCGTTTGGTTTGCCAATGGATAGTTGCTTTTGGGCCAATTCTTAGCACCCGTGGGCTCG  | 359             |              |           |
| Query 1385      | TTGGATGGTCCGAATAACGCAAGGTGCTAAGTATTATTCGGAATAAATCAAAGCATAGA   | 1444            |              |           |
| Sbjct 360       | TTGGATGGACCGAGTAACGCAAGGTGCTAAATATTACTCGAAATAAATCAAAGCATAGA   | 419             |              |           |
| Query 1445      | GATAAGATAAATTTATTTTCTGCTCTTTACAATTGCAAAGTACTCGAGTAGTAAATTCT   | 1504            |              |           |
| Sbjct 420       | GATGAGATAAATTTATTTTCTGCTCTTAATAATTGCAAAGTACTCTTAGTAAATAAATTCT | 479             |              |           |
| Query 1505      | GATTCGTGAAACTTTGTTCCATTAATGTTGAAGTTATGTCACCTCATATGCATGTTGGGA  | 1564            |              |           |
| Sbjct 480       | GATCCGTGAAACTTTGTTCCATTAATGACGAAGTTATATCACTCATATGCATGTTGGGA   | 539             |              |           |
| Query 1565      | AGTGGCTAGGCCGACTCCCGATGCTTGGGGACTATGACTAGTCGGGCAGAGTGTTTAAAC  | 1624            |              |           |
| Sbjct 540       | AGTGCCTAGGCTGACTCCCGGTGCTTGGTGGCTATGACTAGTTGGGCAGAGTGTTTAAAC  | 599             |              |           |

|       |      |                                                                |      |
|-------|------|----------------------------------------------------------------|------|
| Query | 1625 | GTTAGGAGTCATCTGCTCAGGGAAATCAA AATTGACAAGAGGAGAAATACATATTTACAA  | 1684 |
| Sbjct | 600  | GTAATGAGTCATCTGCTCAGGGAAATCAA AATTGACAAGAGAAGAAATACATATTTATAA  | 659  |
| Query | 1685 | ACATTTTAAATACTTGAATTTTTCTCAAGTACTGTATTTACATCAGATACTACTCATCC    | 1744 |
| Sbjct | 660  | ACACTTTT-AATATTTGAATCTTTCTCAAGTACTGTATTTACATCAGATACTACTCATCC   | 718  |
| Query | 1745 | TATATGTTTGTCTTGCAGGGTCAGATCCAGATATGCATAAATAGGGATTTCATGGCTTTAA  | 1804 |
| Sbjct | 719  | TATATGTTTGTCTTAC-----TC-AGAT--ATACAT-CA-AAGA--GATTTCATGGCTTTAA | 767  |
| Query | 1805 | GCTTATCTCCTACGCTTCAGGAATGGATTAGTCAGAACATCACCATCAGCTCGCCTTCGT   | 1864 |
| Sbjct | 768  | GCTTATCTCCTATGTTACAGGAATGGATCAGTCAGAACATCACCACCGGCTTACCGTCGT   | 827  |
| Query | 1865 | CGCCCGGACTAGTGTCTTTGCCTGCACGACTGGCGAATTATGCCGCCGTTGCTGGGCGT    | 1924 |
| Sbjct | 828  | CGCCACCGGCTGGTGTCTTCGCTATACGGTTGGGTGGTCACACCGCCGTTGTTGGGCGT    | 887  |
| Query | 1925 | TTACGTCTTCACCGACCGGCTTGCCTTCATCGCCGCAACTGGTGTCTTTCGCTGCACG     | 1983 |
| Sbjct | 888  | CGTTTTTCGTACCGACCGGCC-GCCT-CGTCCGCCGTCGACTGGTGTCTTTCGCTATACG   | 945  |
| Query | 1984 | GCTAGCGTATTATGCCGCCGTTGC-----TGGGCGTCTACGTCTTTACCATCGGCTTGC    | 2037 |
| Sbjct | 946  | GTT-G-GT-TGGTCACACNNNNNNNNNNATTTGGGCGTCTACGTCTTACCAGCCGGCTTGC  | 1002 |
| Query | 2038 | CTTTGGTGCCACCGACTGGTGTCTTGCCTGTACGGCTGGCGTATTATGCCGCCA-TTGT    | 2096 |
| Sbjct | 1003 | CTTCGTCACCGCCGACTAGTGT-TTCACCTACACGGCTGGCATATTATGCCGCCGTTTGT   | 1061 |
| Query | 2097 | TGGGTGTGACGTCTTACCGACAGGCTTGTCTCCGCCGCCGCGACTGGCGTCTCCGCC      | 2156 |
| Sbjct | 1062 | TGGGCGTATACGTCTTACCGCC-GGCTTGCCTTCGTATCGCCGACTGGTGTCT-CGCC     | 1119 |
| Query | 2157 | TGCACGGCTGGCATATTATGCCGCCGTTA-TTGAGCGTCTACATTTTACCGACCGGCTT    | 2215 |
| Sbjct | 1120 | TACACAGCTGGCATATTATGCCGCCGTTTGTGGGTGTCTACGTCTTTACCGACCGGCTT    | 1179 |
| Query | 2216 | GCCTCCGCTGCCGCCGACTGGTGTCTCCGCCAGCACGGCTAGCCTATTATGCTGCCATTG   | 2275 |
| Sbjct | 1180 | GCCTTCGCCGCCGCGACTGGTGTCTCCGCCCGCACGGCTGGCCTATTATGCCGCCATTG    | 1239 |
| Query | 2276 | TTGGGCGTCTACGTCTTACCAACCGGC-CGCCT-CGTCCGCTGCCGACTGGTGTCTCCA    | 2333 |
| Sbjct | 1240 | TTGGGCGTCTACGTCTTACCG-CCGGCTCGCCTTCG-CCATTGCCGACTGGTGTCTCCG    | 1297 |

```

Query 2334 CCTGCACGGCTGGCCTATTATGCCGTTGTTGTTGGACGTCTACATCTTCATCGACCAGCC 2393
          ||| ||| ||| ||| ||| ||| ||| ||| ||| ||| ||| ||| ||| ||| ||| ||| |||
Sbjct 1298 CCTACATGGTTGATTTATTATGCCGCCGTTGTAGGACGTCTACATCTTCTCCGACCAGCC 1357

```

```

Query 2394 GCCTCGTATGATGCCAACTGGTGCTATCGTCTTCACGGCAGGCC 2437
          ||| ||| ||| ||| ||| ||| ||| ||| ||| ||| ||| ||| |||
Sbjct 1358 ACCTTGTATGACGCCAACTTGTA CTATCGCCTTCACGGCTGGCC 1401

```

**Table of SNPs and InDels in Os02t0592000-00**

|                      | cds | 5' UTR | 3'UTR | Introns |
|----------------------|-----|--------|-------|---------|
| No. of variants: 230 | 0   | 0      | 0     | 230     |
| No. of SNPs: 195     | 0   | 0      | 0     | 195     |
| No.of InDels: 35     | 0   | 0      | 0     | 35      |



**S.No: 6**

**A16: Os02t0574800-01**

**Query: KMR3: scaffold14052\_size6604**

**Subject: IL50-13: scaffold21804\_size3915**

| Score          | Expect                                                        | Identities    | Gaps       | Strand     |
|----------------|---------------------------------------------------------------|---------------|------------|------------|
| 455 bits (246) | 5e-133                                                        | 248/249 (99%) | 0/249 (0%) | Plus/Minus |
| Query 25       | ggcggcggcgCTGGCTGTCCCGCCGGAGGTGCTGGCCGGCGTGGATGAGGTGGCGCAGGA  | 84            |            |            |
| Sbjct 249      | GGCGGCGGCGCTGGCTGTCCCGCAGGAGGTGCTGGCCGGCGTGGATGAGGTGGCGCAGGA  | 190           |            |            |
| Query 85       | CGTCCTGTTTCGACCTCATTGGGAGCTATCCGGAAGTGGACGACGTGTTGCACTTCATGAA | 144           |            |            |
| Sbjct 189      | CGTCCTGTTTCGACCTCATTGGGAGCTATCCGGAAGTGGACGACGTGTTGCACTTCATGAA | 130           |            |            |
| Query 145      | CGAGTGAACGACGTGGCGGGCTTGGCCCCACCACGTGTCGCCGCACGATTGTCCGGGTTTG | 204           |            |            |
| Sbjct 129      | CGAGTGAACGACGTGGCGGGCTTGGCCCCACCACGTGTCGCCGCACGATTGTCCGGGTTTG | 70            |            |            |
| Query 205      | GGCGGGAGGCTAAAAGTCGGGTACAGGTTGATGCTGCATTGCTGGCGCTCTAGTGCTGCTA | 264           |            |            |
| Sbjct 69       | GGCGGGAGGCTAAAAGTCGGGTACAGGTTGATGCTGCATTGCTGGCGCTCTAGTGCTGCTA | 10            |            |            |
| Query 265      | GCCTAGCTA 273                                                 |               |            |            |
| Sbjct 9        | GCCTAGCTA 1                                                   |               |            |            |

**Table of SNPs and InDels in Os02t0574800-01**

|                  | cds | 5' UTR | 3'UTR | Introns |
|------------------|-----|--------|-------|---------|
| No. of variants: | 1   | 1      | 0     | 0       |
| No. of SNPs:     | 1   | 1      | 0     | 0       |
| No. of InDels:   | 0   | 0      | 0     | 0       |

**S.No: 7**

**A1: Os02t0552500-00**

**Query: KMR3: scaffold23485\_size2774**

**Subject: IL50-13: scaffold30709\_size2103**

| Score          | Expect                                                        | Identities    | Gaps       | Strand    |
|----------------|---------------------------------------------------------------|---------------|------------|-----------|
| 713 bits (386) | 0.0                                                           | 392/395 (99%) | 0/395 (0%) | Plus/Plus |
| Query 1        | TACGGCTTAAATGGTTGGCAAAGAGAGGAGAGCATCGCGACAGACCTTGGACAACCATTG  | 60            |            |           |
| Sbjct 21       | TACGGCTTAAATGGTTGGCAAAGAGAGGAGAGCATCGCGACAGACCTTGGACAACCATTG  | 80            |            |           |
| Query 61       | AGACTAAGCAGCCGAAGGAGTTACAGGACTTGTCTTCTCAGCCACACGGCAAGTGTGG    | 120           |            |           |
| Sbjct 81       | AGACTAAGCAGCCGAAGGAGTTACAGGACTTGTCTTCTCAGCCACACGGCAAGTGTGG    | 140           |            |           |
| Query 121      | GAGATGGGGGAAAACACAAAGTTTTGGCTTGCGGATTGGCTGCCAATTGGGAGCATAAAG  | 180           |            |           |
| Sbjct 141      | GAGATGGGGGAAAACACAAAGTTTTGGCTTGCGGATTGGCTGCCAATTGGGAGTATAAAG  | 200           |            |           |
| Query 181      | GCGAGATTTCCATTAAATCTTCAATCATGTGGAGCGCAAGGGTTTGACAGTGGCGAGAGGA | 240           |            |           |
| Sbjct 201      | GCGAGATTTCCATTAAATCTTCAATCATGTGGAGCGCAAGGGTTTGACAGTGGCGAGAGGA | 260           |            |           |
| Query 241      | CTACAGAACCATAGGTGGGTGCGCGACATCAAAGGAGCTCCATCCAACCGAGCCATTGGG  | 300           |            |           |
| Sbjct 261      | CTACAGAACCATAGGTGGGTGCGCGACATCAAAGGAGCTCCATCCAACCGAGCCATTGGG  | 320           |            |           |
| Query 301      | GAGTACTTTCAAATTTGGGATGCGATCCAGAAGGTGCAGCTGTGAGGAGGGGAAGAGGAT  | 360           |            |           |
| Sbjct 321      | GAGTACTTTCAAATTTGGGATGCGATCCAGAAGGTGCAGCTGTGAGGAGGGGAAGAGGAT  | 380           |            |           |
| Query 361      | GAGACAATATGGAAGTGGGCCTCGAATGGAAGATT                           | 395           |            |           |
| Sbjct 381      | GAGACAATATGGAAGTGGGCCTCGAATGGAAGATT                           | 415           |            |           |

**Table of SNPs and InDels in Os02t0552500-00**

|                  | cds | 5' UTR | 3'UTR | Introns |
|------------------|-----|--------|-------|---------|
| No. of variants: | 3   | 0      | 0     | 0       |
| No. of SNPs:     | 3   | 0      | 0     | 0       |
| No. of InDels:   | 0   | 0      | 0     | 0       |

**S.No: 8**

**A12: Os02t0569900-01**

**Query: KMR3: scaffold7129\_size12786**

**Subject: IL50-13: scaffold24827\_size3169**

| Score          | Expect                                                           | Identities    | Gaps       | Strand     |
|----------------|------------------------------------------------------------------|---------------|------------|------------|
| 220 bits (119) | 1e-61                                                            | 192/228 (84%) | 2/228 (0%) | Plus/Minus |
| Query 1071     | GGGAAGGA-GTACGAGTACCTGCCGTTCCGGGTCCGGGAGGAGGCTGTGCCCGGGGCTGCC    | 1129          |            |            |
| Sbjct 340      | GGGAAGGACGT-GGAGTTTCATGCCGTTCCGGGTCCGGGAGGC GGCTGTGCCCGGGGCTGCC  | 282           |            |            |
| Query 1130     | GCTGGCGGAGCGCGTCTGCGCCGTTCCGTGCTGGCCTCGCTGCTGCGCGCGTTCGAGTGGCG   | 1189          |            |            |
| Sbjct 281      | GCTGGCGGAGCGCGTCTGCGCCGTTTCATCCTGGCGTTCGATGCTGCACACGTTTCGAGTGGAA | 222           |            |            |
| Query 1190     | CCTCCCCGATGGCGTGTCCGCCGAGGACCTGGACGT CAGCGAGAGGTTCAACACCGCCAA    | 1249          |            |            |
| Sbjct 221      | GCTCCCCGGCGGCATGACGGCGGAGGACGTGGACGTGTCCGAGAAGTTCAAGTCTGCCAA     | 162           |            |            |
| Query 1250     | TGTGCTCGCCGTGCCTCTCAAGGTCGTGCCTGTCGTTCGTCAACTAGTC                | 1297          |            |            |
| Sbjct 161      | TGTGCTTGCCGTGCCTCTCAAGGCCGTGCCTGTCCTGATCAAATAGTC                 | 114           |            |            |

**Table of SNPs and InDels in Os02t0569900-01**

|                    | cds | 5' UTR | 3'UTR | Introns |
|--------------------|-----|--------|-------|---------|
| No. of variants:36 | 36  | 0      | 0     | 0       |
| No. of SNPs: 34    | 34  | 0      | 0     | 0       |
| No.of InDels: 2    | 2   | 0      | 0     | 0       |

**S.No: 9**

**A62: Os02t0626400-01**

**Query: KMR3: scaffold13385\_size7025\_2826\_4920**

**Subject:IL50-13: scaffold12144\_size7524\_2050\_4141 Reversed:**

| Score            | Expect                                                         | Identities      | Gaps         | Strand    |
|------------------|----------------------------------------------------------------|-----------------|--------------|-----------|
| 2780 bits (1505) | 0.0                                                            | 1901/2096 (91%) | 11/2096 (0%) | Plus/Plus |
| Query 1          | GCCCCGCGCCGACCCGCTCAACTGGGGGAAGGCGGCGGAGGAGATGGCCGGGAGCCACCT   | 60              |              |           |
| Sbjct 7          | GCCCCGCGCCGACCCGCTTAACTGGGGGAAGGCGGCGGAGGAGATGTCGGGGAGCCACCT   | 66              |              |           |
| Query 61         | CGACGAGGTGAAGAGGATGGTGGCCGAGTACCGGCAGCCCGTGGTGC GGATCGAGGGGCGC | 120             |              |           |
| Sbjct 67         | CGACGAGGTGAAGC GGATGGTGGCCGAGTACCGCCAGCCGCTGGTGAAGATCGAGGGGCGC | 126             |              |           |
| Query 121        | CAGCCTGAGGATCGCGCAGGTGGCGGCGGTGGCCGCGCCGGCGACGGGCGAGGCGCCCAT   | 180             |              |           |
| Sbjct 127        | CAGCCTGAGGATCGCGCAGGTGCGCGCGGTG--GCCG--CGGC--CGGCGA---AGCCAG   | 177             |              |           |
| Query 181        | GGTCGAGCTCGACGAGTCGGCCCGCGGAGCGCGTCAAGGCCAGCAGCGACTGGGTGATGAA  | 240             |              |           |
| Sbjct 178        | GGTCGAGCTCGACGAGTCGGCCCGCGGAGCGCGTCAAGGCCAGCAGCGACTGGGTGATGAA  | 237             |              |           |
| Query 241        | CAGCATGGCGAACGGCACCGACAGCTACGGCGTCAACCACCGGTTTCGGGCGCCACGTCCGA | 300             |              |           |
| Sbjct 238        | CAGCATGATGAACGGCACCGACAGCTATGGTGTCAACCACCGGTTTCGGGCGCCACGTCCCA | 297             |              |           |
| Query 301        | CCGGCGGACCAAGGAGGGCGGCGCGCTGCAGCGGGAGCTCATCAGGTTCTCAACGCCGG    | 360             |              |           |
| Sbjct 298        | CAGGAGGACCAAGGAAGGTGGTGGCCTGCAAAGAGAGCTCATCAGGTTCTCAATGCCGG    | 357             |              |           |
| Query 361        | CGCCTTCGGCACCGGCGCCGACGGCCACGTCCTCCCCGCGGGTGCCACGCGCGCGGCGAT   | 420             |              |           |
| Sbjct 358        | CGCCTTCGGCACGAGCACGGACGGCCACGTCCTGTCCGCGAGGCCACGCGCGCGGCGAT    | 417             |              |           |
| Query 421        | GCTCGTCCGATCAACACCCTGCTGCAAGGCTACTCCGGCATCCGGTTTCGAGATCCTCGA   | 480             |              |           |
| Sbjct 418        | GCTCGTCCGCATCAACACGCTCCTCCAGGGCTACTCCGGCATCCGTTTCGAGATCCTCGA   | 477             |              |           |
| Query 481        | GGCGGTTCGCCAAGCTGCTCAACGCCAACGTCACGCCGTGCCTGCCGCTCCGGGGCACGAT  | 540             |              |           |
| Sbjct 478        | GGCGATTACCAAGCTGCTCAATGCCAACGTCACGCCATGCCTGCCACTCAGGGGCACGGT   | 537             |              |           |
| Query 541        | CACCGCGTCCGGCGACCTCGTCCCGCTCTCCTACATCGCCGGGCTCGTCACCGGCCGGGA   | 600             |              |           |
| Sbjct 538        | GACCGCGTCCGGCGACCTGGTCCCGCTCTCCTACATTGCCGGCTTGGTCACCGGCCGGGA   | 597             |              |           |





**Table of SNPs and InDels in Os02t0626400-01**

|                  |     | cds | 5' UTR | 3'UTR | Introns |
|------------------|-----|-----|--------|-------|---------|
| No. of variants: | 195 | 195 | 0      | 0     | 0       |
| No. of SNPs:     | 184 | 184 | 0      | 0     | 0       |
| No. of InDels:   | 11  | 11  | 0      | 0     | 0       |

**S.No: 10**

**A63: Os02t0627100-01**

**Query: KMR3: scaffold7515\_size12279\_1251\_3210**

**Subject:IL50-13: scaffold12144\_size7524\_2051\_4200**

| Score            | Expect                                                          | Identities      | Gaps         | Strand     |
|------------------|-----------------------------------------------------------------|-----------------|--------------|------------|
| 2032 bits (1100) | 0.0                                                             | 1533/1751 (88%) | 13/1751 (0%) | Plus/Minus |
| Query 1          | CAGATTTCCTCAATGCCGGCGCGTTTCGGCAGTGGCACCGACGGCCATGTTTTGCCGGCAGA  | 60              |              |            |
| Sbjct 1752       | CAGGTTTCCTCAATGCCGGCGCCTTCGGCA CGAGCACGGACGGCCACGTCTCTGTCCGCCGA | 1693            |              |            |
| Query 61         | GGCAACCCGCGCGGCAATGCTCGTCCGCATCAACACACTCCTCCAGGGATACTCCGGCAT    | 120             |              |            |
| Sbjct 1692       | GGCCACGCGCGCGGCATGCTCGTCCGCATCAACACGCTCCTCCAGGGCTACTCCGGCAT     | 1633            |              |            |
| Query 121        | CCGTTTCGAGATCCTCGAGGCGATCGCCAAGCTGCTCAACGCGAACGTCACGCCGTGCCT    | 180             |              |            |
| Sbjct 1632       | CCGCTTCGAGATCCTCGAGGCGATTACCAAGCTGCTCAATGCCAACGTCACGCCATGCCT    | 1573            |              |            |
| Query 181        | GCCGCTCCGGGGCAGCATCACGGCGTCCGGTGACCTCGTCCCGCTGTCCTACATTGCCGG    | 240             |              |            |
| Sbjct 1572       | GCCACTCAGGGGCAGGTTGACCGCGTCCGGCGACCTGGTCCCGCTCTCCTACATTGCCGG    | 1513            |              |            |
| Query 241        | TCTT-GTCACTGGGCGCGAGAATGCCGTGGCAGTTGCACCAGATGGCAGCAAGGTGAACG    | 299             |              |            |
| Sbjct 1512       | -CTTGTCACC GGCCGCGAGA ACTCTGTGCGGTCGCTCCTGATGGCAGCAAGGTGAACG    | 1454            |              |            |
| Query 300        | CCGCTGAGGCGTTCAAGATTGCTGGCATCCAGGGCGGCTTCTTCGAGCTGCAGCCCAAGG    | 359             |              |            |
| Sbjct 1453       | CCTCTGAGGCGTTTAAGATTGCTGGCATCCAAGGTGGCTTCTTCGAGTTGCAGCCCAAGG    | 1394            |              |            |
| Query 360        | AAGGCCTTGCCATGGTCAATGGCACCGCCGTGGGCTCTGGCCTTGCCATCGACCGTGCTCT   | 419             |              |            |
| Sbjct 1393       | AAGGCTCTGCCATGGTGAATGGCACTGCCGTGGGCTCTGGACTTGCCCTCCACGGTGCTCT   | 1334            |              |            |
| Query 420        | TTGAGGCCAACATTCTTGCCATCCTCGCCGAGGTCCTCTCGGCCGTGTTCTGCGAGGTGA    | 479             |              |            |
| Sbjct 1333       | TTGAGGCCAACATTCTTGCTGTCCTTGCCGAGGTCCTGTCCGCCGTGTTCTGCGAGGTGA    | 1274            |              |            |
| Query 480        | TGAACGGCAAGCCGGAGTACACCGACCACCTTACTCACAAGCTCAAACACCATCCAGGAC    | 539             |              |            |
| Sbjct 1273       | TGAACGGCAAGCCGGAGTACACCGACCACCTGACCACAAGCTGAAGCACCACCTGGAC      | 1214            |              |            |
| Query 540        | AGATCGAGGCCGCGCCATCATGGAGCACATCTTGAAGGAAGCTCCTACATGAAGCATG      | 599             |              |            |
| Sbjct 1213       | AGATCGAGGCTGCTGCCATCATGGAGCACATCTTGAAGGCAGCTCGTACATGAAGCTGG     | 1154            |              |            |







**S.No: 11**

**B8: Os08t0468100-03**

**Query: KMR3: scaffold32698\_size2633**

**Subject: IL50-13: scaffold5531\_size12871**

| Score            | Expect                                                        | Identities      | Gaps        | Strand    |
|------------------|---------------------------------------------------------------|-----------------|-------------|-----------|
| 2891 bits (1565) | 0.0                                                           | 1582/1589 (99%) | 6/1589 (0%) | Plus/Plus |
| Query 1          | TCTCATCTTGCATACGCATGCATGCAGCATTTTCGTTTCTAATTGGCACGACACGTATATA | 60              |             |           |
| Sbjct 125        | TCTCATCTTGCATACGCATGCATGCAGCATTTTCGTTTCTAATTGGCACGACACGTATATA | 184             |             |           |
| Query 61         | CATCGTCGTACGTATAACCAAATAATTAATGCGGTGCGTATAATTTAGTAGTAGGAGTTT  | 120             |             |           |
| Sbjct 185        | CATCGTCGTACGTATAACCAAATAATTAATGCGGTGCGTATAATTTAGTAGTAGGAGTTT  | 244             |             |           |
| Query 121        | AGAACACGATGAAAGAATTGGCCATGTCGTACTTCATCTTCTCCAGGTTTCGGCGAGACGG | 180             |             |           |
| Sbjct 245        | AGAACACGATGAAAGAATTGGCCATGTCGTACTTCATCTTCTCCAGGTTTCGGCGAGACGG | 304             |             |           |
| Query 181        | CGAACTTGATCATCGGCGGCGGCCCGCAGGCGAGCGCGAGCGTGTTCGTCGCCGCCCTCCG | 240             |             |           |
| Sbjct 305        | CGAACTTGATCATCGGCGGCGGCCCGCAGGCGAGCGCGAGCGTGTTCGTCGCCGCCCTCCG | 364             |             |           |
| Query 241        | GCACGTGCTCCCGCAGCACCTCCTCCGTGACGAACCCGACGCCGTA CTTCACCCCTTCCT | 300             |             |           |
| Sbjct 365        | GCACGTGCTCCCGCAGCACCTCCTCCGTGACGAACCCGACGCCGTA CTTCACCCCTTCCT | 424             |             |           |
| Query 301        | CCGCGCGCTTACCTGGTCGATGACGTACCACACCTTGAGCCTGTCCGGGTACTCCGCCG   | 360             |             |           |
| Sbjct 425        | CCGCGCGCTTACCTGGTCGATGACGTACCACACCTTGAGCCTGTCCGGGTACTCCGCCG   | 484             |             |           |
| Query 361        | CCCACCGGTCGAGCTCGTCGCGGAGGAGGATGTCGTCCTCCGTCCGGTTCGCGTACACCA  | 420             |             |           |
| Sbjct 485        | CCCACCGGTCGAGCTCGTCGCGGAGGAGGATGTCGTCCTCCGTCCGGTTCGCGTACACCA  | 544             |             |           |
| Query 421        | GGTGCATCTCCGTCTGTGTCCTCCGGCTGGTCGCGCAGCACCGACTGGATGACCTGGTACA | 480             |             |           |
| Sbjct 545        | GGTGCATCTCCGTCTGTGTCCTCCGGCTGGTCGCGCAGCACCGACTGGATGACCTGGTACA | 604             |             |           |
| Query 481        | TGGGCGTGATCCCCTCCCGCCGGCGATCATCGCCAGCCGCCGCGGTTCCGCGGCTTGC    | 540             |             |           |
| Sbjct 605        | TGGGCGTGATCCCCTCCCGCCGGCGATCATCGCCAGCCGCCGCGGTTCCGCGGCTTGC    | 664             |             |           |
| Query 541        | CGTTGATGACGAACTCGCCCGGCGCGGTGTA CTTCGACGTGGCCGAGTGGCCCTTGACGT | 600             |             |           |
| Sbjct 665        | CGTTGATGACGAACTCGCCCGGCGCGGTGTA CTTCGACGTGGCCGAGTGGCCCTTGACGT | 724             |             |           |

|       |      |                                                               |      |
|-------|------|---------------------------------------------------------------|------|
| Query | 601  | CGATGTAGGCGCCACGGGGAGCGAGTCCAGGTA                             | 660  |
|       |      |                                                               |      |
| Sbjct | 725  | CGATGTAGGCGCCACGGGGAGCGAGTCCAGGTA                             | 784  |
| Query | 661  | ACTTGGGGTGCTCGTTCTTGAAGTACACCTTGATGAGGAGGTCGAAGTGGCCGACCTCGT  | 720  |
|       |      |                                                               |      |
| Sbjct | 785  | ACTTGGGGTGCTCGTTCTTGAAGTACACCTTGATGAGGAGGTCGAAGTGGCCGACCTCGT  | 844  |
| Query | 721  | CGACCATGCTCGTCGGCGTGTACGCCCGCATGCACAGCTTCCCTTCGATGCTGGCGCACA  | 780  |
|       |      |                                                               |      |
| Sbjct | 845  | CGACCATGCTCGTCGGCGTGTACGCCCGCATGCACAGCTTCCCTTCGATGCTGGCGCACA  | 904  |
| Query | 781  | CGAAGATGTGCTTGCCGACGGGGAGGCCGAGCACCTGGTCGGAGGACGGCAGCGCGAAGC  | 840  |
|       |      |                                                               |      |
| Sbjct | 905  | CGAAGATGTGCTTGCCGACGGGGAGGCCGAGCACCTGGTCGGAGGACGGCAGCGCGAAGC  | 964  |
| Query | 841  | GGAAGAGGCGGACGTCGCGGGAGAGCTCCTTCTTGTCGACGAGTTGGCAGGGGACCTTGT  | 900  |
|       |      |                                                               |      |
| Sbjct | 965  | GGAAGAGGCGGACGTCGCGGGAGAGCTCCTTCTTGTCGACGAGTTGGCAGGGGACCTTGT  | 1024 |
| Query | 901  | CGCGCGGGCTGGAGAGCGCGACGGGGCGCCGGCGCCTTGATGGCCTCGCGGATGGGGGCGA | 960  |
|       |      |                                                               |      |
| Sbjct | 1025 | CGCGCGGGCTGGAGAGCGCGACGGGGCGCCGGCGCCTTGATGGCCTCGCGGATGGGGGCGA | 1084 |
| Query | 961  | GCTGGGAGAGGTTGGACGCGCCGTGGACGGAGTTGTCGGAGCTGTACCCGGCGCCGGTGG  | 1020 |
|       |      |                                                               |      |
| Sbjct | 1085 | GCTGGGAGAGGTTGGACGCGCCGTGGACGGAGTTGTCGGAGCTGTACCCGGCGCCGGTGG  | 1144 |
| Query | 1021 | TGATGAGCTCGCCGATGCGGTAGGTGTCGAGGAGCGCCTTGGCCTTGTCGGAGTGGATGG  | 1080 |
|       |      |                                                               |      |
| Sbjct | 1145 | TGATGAGCTCGCCGATGCGGTAGGTGTCGAGGAGCGCCTTGGCCTTGTCGGAGTGGATGG  | 1204 |
| Query | 1081 | CGTCGAACTCCTCGGTGCAGTCGGTGCCGGCGTTGATGAGGATGCTGTGCGGCGCCCGG   | 1140 |
|       |      |                                                               |      |
| Sbjct | 1205 | CGTCGAACTCCTCGGTGCAGTCGGTGCCGGCGTTGATGAGGATGCTGTGCGGCGCCCGG   | 1264 |
| Query | 1141 | GGTGGTCCTTGAGGAAGGCCGTGCAGTCGTAGACGTGACCGTGGACGACGATCCACGCCG  | 1200 |
|       |      |                                                               |      |
| Sbjct | 1265 | GGTGGTCCTTGAGGAAGGCCGTGCAGTCGTAGACGTGACCGTGGACGACGATCCACGCCG  | 1324 |
| Query | 1201 | AGTCCTGCGACGAGTGCTTGCGCACCTCGGACATGGTAAACTGCTTGCCGTGCGGTGGTGT | 1260 |
|       |      |                                                               |      |
| Sbjct | 1325 | AGTCCTGCGACGAGTGCTTGCGCACCTCGGACATGGTAAACTGCTTGCCGTGCGGTGGTGT | 1384 |
| Query | 1261 | TCATGAACGGCGTCGACGTGCTCCGCTTACCCCCGGTGCGGCCGCCTCCGCCGTCTCCA   | 1320 |
|       |      |                                                               |      |
| Sbjct | 1385 | TCATGAACGGCGTCGACGTGCTCCGCTTACCCCCGGTGCGGCCGCCTCCGCCGTCTCCA   | 1444 |
| Query | 1321 | GGTGCTTCTGCCTCGCCATCCACCCGCCGGTCTGGTTCCCGGGCTGCGTCCGGTGCTCGA  | 1380 |
|       |      |                                                               |      |
| Sbjct | 1445 | GGTGCTTCTGCCTCGCCATCCACCCGCCGGTCTGGTTCCCGGGCTGCGTCCGGTGCTCGA  | 1504 |

```

Query 1381 ACACCAGCCCGATCTCACCCCTTGTGCGGCCGGCACACGTTACCTTCACCTTGAACCAGC 1440
          |||
Sbjct 1505 ACACCAGCCCGATCTCACCCCTTGTGCGGCCGGCACACGTTACCTTCACCTTGAACCAGC 1564

Query 1441 AGTTGTTTCATCATCCCCTGCAAAAACCCAACCGATCGAATGAATTTGCCATCGTCGTCTA 1500
          |||
Sbjct 1565 AGTTGTTTCATCATCCCCTGCAAAAACCCAACCGATCGAATGAATTTGCCATCGTCGTCTA 1624

Query 1501 CATCGCCGTCGCCGTCGCCATGGCCGGAGACGAAATGAAGAACCTACCATGAGATTCCAG 1560
          |||
Sbjct 1625 CATCGCCGTCGCC-T-----TGGCCGGAGACGGAATGAAGAACCTACCATGAGATTCCAG 1678

Query 1561 ATGAGCTTCTCGGGCTGGGTGTTGTGCGA 1589
          |||
Sbjct 1679 ATGAGCTTCTCGGGCTGGGTGTTGTGCGA 1707

```

**Table of SNPs and InDels in Os08t0468100-03**

|                   | cds | 5' UTR | 3'UTR | Introns |
|-------------------|-----|--------|-------|---------|
| No. of variants:7 | 0   | 0      | 0     | 7       |
| No. of SNPs: 1    | 0   | 0      | 0     | 1       |
| No.of InDels: 6   | 0   | 0      | 0     | 6       |

**S.No: 12**

**B21: Os08t0487301-00**

**Query: KMR3: scaffold243\_size48649**

**Subject: IL50-13: scaffold6702\_size11543**

Score Expect Identities Gaps Strand  
492 bits (266) 7e-144 289/300 (96%) 2/300 (0%) Plus/Minus

```
Query 1 TCTCCCAGTGCCAGTAGCCGGTCCGGGAGAGGCGGCAGAGGAAGGGGAGATCGAAGATGA 60
      |||
Sbjct 396 TCTCCCAGTGCCAGTAGCCGGTCCGGGAGAGGCGGCAGAGGAAGGGGAGATCGAAGATGA 337

Query 61 CGGCGCCGCCGATGTGGCTGCCGTTTGGTGGGGCGGAGCGGCGGGAGACCGCGGCCGGCGG 120
      |||
Sbjct 336 CGGCGCCGCCGATGTGGCTGCCGTTTGGCGGGGCGGAGCTGCGGGAGACCGCGGTGGTGG 277

Query 121 AGCTAGAGCCACACGTGCGACGGCTCCCTGGTCAACTTGCGCAGCCGCGAACAAGTAGAG 180
      |||
Sbjct 276 AGCTGGAGCCACACGCGCGACGGCTCCCTGGCCAAGTTGCGCAGCCGCGAACAAGGAGAG 217

Query 181 CCACGCCTTCACCGCCGCCTCGCGATGACGATGGCGATGAGTTCGATCTCCGGCCGCCGC 240
      |||
Sbjct 216 CCACGCCTTCACCGCCGCCTCGCGATGACGATGGCGATGAGTTCGATCTCCGGCCGCCGC 157

Query 241 CCAGCCGCGTGCATGAGCTGGAGGAGGTGCCGGCGAGTTTCGGCAGTGAGTTTCGTCT 299
      |||
Sbjct 156 CCCGCCGCGTGCATGAGCTGGAGGAGGTGCCGGCGAGTTTCGGCAGTGAGTTTCGTCT 98
```

**Table of SNPs and InDels in Os08t0487301-00**

|                    | cds | 5' UTR | 3'UTR | Introns |
|--------------------|-----|--------|-------|---------|
| No. of variants:11 | 7   | 0      | 0     | 4       |
| No. of SNPs: 9     | 5   | 0      | 0     | 4       |
| No.of InDels: 2    | 2   | 0      | 0     | 0       |

**S.No: 13**

**B23: Os08t0490100-01**

**Query: KMR3: scaffold8993\_size10535**

**Subject: IL50-13: scaffold3687\_size21453**

Score 154 bits (83) Expect 3e-42 Identities 132/155 (85%) Gaps 6/155 (3%) Strand Plus/Plus

```
Query 345 TGCCCGCGGTGCGAGTCGCGGGACACCAAATTCTGCTACTACAACAACCTACAACACCTCC 404
          |||||
Sbjct 1 TGCCCGCGGTGCAAACTCGACGAACACCAAAGTTCTGCTACTACAACAACCTACA--GCCT-C 57

Query 405 CAGC-CCCG-GC-ACTTCTGCAAGTGTGTCGCGCCGCTACTGGACCAAGGGTGGCACGCTC 461
          |||||
Sbjct 58 CAGCAGCCCGCGCTACTTCTGCAAGACGTGTCGCGCCGCTACTGGACGGAGGGCGGCTCGCTC 117

Query 462 CGCAACGTCCCCGTCGGCGGGCGGCACGCGCAAGAA 496
          |||||
Sbjct 118 CGCAACGTCCCCGTCGGCGGGCGGCTCGCGCAAGAA 152
```

**Table of SNPs and InDels in Os08t0490100-01**

|                    | cds | 5' UTR | 3'UTR | Introns |
|--------------------|-----|--------|-------|---------|
| No. of variants:23 | 23  | 0      | 0     | 0       |
| No. of SNPs: 17    | 17  | 0      | 0     | 0       |
| No.of InDels: 6    | 6   | 0      | 0     | 0       |

**S.No: 14**

**C1: Os01t0314800-01**

**Query: KMR3: scaffold2182\_size25019**

**Subject: IL50-13: scaffold17822\_size5094**

| Score          | Expect | Identities                                                   | Gaps               | Strand     |
|----------------|--------|--------------------------------------------------------------|--------------------|------------|
| 800 bits (433) | 0.0    | 435/436 (99%)                                                | 0/436 (0%)         | Plus/Minus |
| Query 296      |        | GTCCACCTCCTTTGCGCCGCCGGCCGGCCGGTAGTACCCGGT                   | CACCGGGTCCGGCACCCA | 355        |
| Sbjct 436      |        | GTCCACCTCCTTTGCGCCGCCGGCCGGCCGGTAGTACCCGGT                   | GACCGGGTCCGGCACCCA | 377        |
| Query 356      |        | CGCCGTCTTCTCCTCGGCGGCCTTCGCCATCGTGCGCTTGGCCACCGCCGCCGCCACCTT |                    | 415        |
| Sbjct 376      |        | CGCCGTCTTCTCCTCGGCGGCCTTCGCCATCGTGCGCTTGGCCACCGCCGCCGCCACCTT |                    | 317        |
| Query 416      |        | CTTCTCGTCCGCCCTCCGGCCGGCTCCCTTCGCCACGGCCGCCGCCACCGAGTAACCCCT |                    | 475        |
| Sbjct 316      |        | CTTCTCGTCCGCCCTCCGGCCGGCTCCCTTCGCCACGGCCGCCGCCACCGAGTAACCCCT |                    | 257        |
| Query 476      |        | CCTGCAAATCATCATCACACATCACCCACGGATTAATTAATTGGCCATCAATACACAAA  |                    | 535        |
| Sbjct 256      |        | CCTGCAAATCATCATCACACATCACCCACGGATTAATTAATTGGCCATCAATACACAAA  |                    | 197        |
| Query 536      |        | CAACACACTAACACAGCACTTGTAAGAAAACAAACGATTTTCATGGACAACCTGAATGCA |                    | 595        |
| Sbjct 196      |        | CAACACACTAACACAGCACTTGTAAGAAAACAAACGATTTTCATGGACAACCTGAATGCA |                    | 137        |
| Query 596      |        | TGGAGAGCTAACCTTTGTGCCAGAAGGCTGAGACAGCTCGATGCAACCCTCTCCATGGAT |                    | 655        |
| Sbjct 136      |        | TGGAGAGCTAACCTTTGTGCCAGAAGGCTGAGACAGCTCGATGCAACCCTCTCCATGGAT |                    | 77         |
| Query 656      |        | GATCAACTTCTTTCTCTCTCTAAGTTTGAACATATGTAAAAATGAGCTGGTAAATCAG   |                    | 715        |
| Sbjct 76       |        | GATCAACTTCTTTCTCTCTCTAAGTTTGAACATATGTAAAAATGAGCTGGTAAATCAG   |                    | 17         |
| Query 716      |        | GAATCTTGTTTGAGTT                                             |                    | 731        |
| Sbjct 16       |        | GAATCTTGTTTGAGTT                                             |                    | 1          |

**Table of SNPs and InDels in Os01t0314800-01**

|                   | cds | 5' UTR | 3'UTR | Introns |
|-------------------|-----|--------|-------|---------|
| No. of variants:1 | 1   | 0      | 0     | 0       |
| No. of SNPs: 1    | 1   | 0      | 0     | 0       |
| No.of InDels: 0   | 0   | 0      | 0     | 0       |



**S.No: 15**

**C4: Os02t0831500-01**

**Query: KMR3: scaffold8577\_size10987**

**Subject: IL50-13: scaffold5992\_size12325**

| Score            | Expect                                                       | Identities      | Gaps        | Strand     |
|------------------|--------------------------------------------------------------|-----------------|-------------|------------|
| 5330 bits (2886) | 0.0                                                          | 2889/2890 (99%) | 1/2890 (0%) | Plus/Minus |
| Query 1          | AGCT-ATTTAATAAATTTTAAGTAAAATCATACTAAAAAATATATGATTTTGTGGATG   | 59              |             |            |
| Sbjct 2890       | AGCT-ATTTAATAAATTTTAAGTAAAATCATACTAAAAAATATATGATTTTGTGGATG   | 2831            |             |            |
| Query 60         | CTAGCCACGCAATTGCGCGGGCCACCCAGCTAGTTATCATATATGATACTACATAATCAC | 119             |             |            |
| Sbjct 2830       | CTAGCCACGCAATTGCGCGGGCCACCCAGCTAGTTATCATATATGATACTACATAATCAC | 2771            |             |            |
| Query 120        | TTATTGAGAATTCAGATAGATAGTGACACATGAATAAATGCACATATTGCAGCTAACAAG | 179             |             |            |
| Sbjct 2770       | TTATTGAGAATTCAGATAGATAGTGACACATGAATAAATGCACATATTGCAGCTAACAAG | 2711            |             |            |
| Query 180        | GCTCATACCAGAAGCAAAGGGCACCAAATGCAATGTAGAGTTGGAACCGATTGAAAACAC | 239             |             |            |
| Sbjct 2710       | GCTCATACCAGAAGCAAAGGGCACCAAATGCAATGTAGAGTTGGAACCGATTGAAAACAC | 2651            |             |            |
| Query 240        | AAAGCACTCCAACATCCTCCGTGTGCCATTCAAGACTGAGGATGGCAAAGTTCTTCCACA | 299             |             |            |
| Sbjct 2650       | AAAGCACTCCAACATCCTCCGTGTGCCATTCAAGACTGAGGATGGCAAAGTTCTTCCACA | 2591            |             |            |
| Query 300        | GTGGGTCTCCCGGTTTGACATCTATCCTTACCTGGAGAGATATGCCAGGTTTGCCAGCC  | 359             |             |            |
| Sbjct 2590       | GTGGGTCTCCCGGTTTGACATCTATCCTTACCTGGAGAGATATGCCAGGTTTGCCAGCC  | 2531            |             |            |
| Query 360        | AGTTAGATGCCGATTCATTCCTACTGCACATATTTAATTTTACCTGCAGCATTTCATT   | 419             |             |            |
| Sbjct 2530       | AGTTAGATGCCGATTCATTCCTACTGCACATATTTAATTTTACCTGCAGCATTTCATT   | 2471            |             |            |
| Query 420        | GACAATAAECTTCCTTGAATTATTGTACATGTCGATATCAGGATTCTTCAGTCAAGATTC | 479             |             |            |
| Sbjct 2470       | GACAATAAECTTCCTTGAATTATTGTACATGTCGATATCAGGATTCTTCAGTCAAGATTC | 2411            |             |            |
| Query 480        | TCGAAATATTGGAGGGGAAACCAGACTTGGTCATTGGCAATTACACCGACGGTAATCTAG | 539             |             |            |
| Sbjct 2410       | TCGAAATATTGGAGGGGAAACCAGACTTGGTCATTGGCAATTACACCGACGGTAATCTAG | 2351            |             |            |
| Query 540        | TAGCATCCCTCCTGACAAGCAAAGTAGGAGTCACTCAGGTGAAAACGGATCACTACAGCA | 599             |             |            |
| Sbjct 2350       | TAGCATCCCTCCTGACAAGCAAAGTAGGAGTCACTCAGGTGAAAACGGATCACTACAGCA | 2291            |             |            |

|       |      |                                                               |      |
|-------|------|---------------------------------------------------------------|------|
| Query | 600  | ATAAGATCATGCTGGTTTTAAATAATGGCCAACCTTTTGCATATTCATGAGATTATAATG  | 659  |
|       |      |                                                               |      |
| Sbjct | 2290 | ATAAGATCATGCTGGTTTTAAATAATGGCCAACCTTTTGCATATTCATGAGATTATAATG  | 2231 |
| Query | 660  | ACTAAATATGCCAACACATCGCTAAAAGAACTTACCATCACCAATCAACAGGGAACAAT   | 719  |
|       |      |                                                               |      |
| Sbjct | 2230 | ACTAAATATGCCAACACATCGCTAAAAGAACTTACCATCACCAATCAACAGGGAACAAT   | 2171 |
| Query | 720  | AGCGCATGCTCTAGAGAAGACGAAGTACGAGGATTCAGACATCAAGTGGAGAGAATTGGA  | 779  |
|       |      |                                                               |      |
| Sbjct | 2170 | AGCGCATGCTCTAGAGAAGACGAAGTACGAGGATTCAGACATCAAGTGGAGAGAATTGGA  | 2111 |
| Query | 780  | CCACAAGTACCATTTCTCATGCCAGTTTACTGCTGACATGATTGCCATGAACACTAGTGA  | 839  |
|       |      |                                                               |      |
| Sbjct | 2110 | CCACAAGTACCATTTCTCATGCCAGTTTACTGCTGACATGATTGCCATGAACACTAGTGA  | 2051 |
| Query | 840  | CTTCATCATCGCTAGTACCTACCAAGAAATAGCTGGAAGGTCAGTTACTCCACAAACCAA  | 899  |
|       |      |                                                               |      |
| Sbjct | 2050 | CTTCATCATCGCTAGTACCTACCAAGAAATAGCTGGAAGGTCAGTTACTCCACAAACCAA  | 1991 |
| Query | 900  | AATCCTTTTACCTTGTGGCTTAGAACTACCACATGCAGCTGATAGCCTGACATTGGAGC   | 959  |
|       |      |                                                               |      |
| Sbjct | 1990 | AATCCTTTTACCTTGTGGCTTAGAACTACCACATGCAGCTGATAGCCTGACATTGGAGC   | 1931 |
| Query | 960  | GTCAAAAATATAAAATGCAGCAAAGAGAAGCCTGGCCAGTATGAGAGTCACTATGCATTC  | 1019 |
|       |      |                                                               |      |
| Sbjct | 1930 | GTCAAAAATATAAAATGCAGCAAAGAGAAGCCTGGCCAGTATGAGAGTCACTATGCATTC  | 1871 |
| Query | 1020 | ACTATGCCAGGGCTCTGCCGCTATGCCACAGGCATCAACGTATTTGATCCCAAGTTCAAC  | 1079 |
|       |      |                                                               |      |
| Sbjct | 1870 | ACTATGCCAGGGCTCTGCCGCTATGCCACAGGCATCAACGTATTTGATCCCAAGTTCAAC  | 1811 |
| Query | 1080 | ATTGCTGCACCAGGTGCAGATCAATCTGTTTACTTTCCCTTTACACAAAAGCAGAAGCGC  | 1139 |
|       |      |                                                               |      |
| Sbjct | 1810 | ATTGCTGCACCAGGTGCAGATCAATCTGTTTACTTTCCCTTTACACAAAAGCAGAAGCGC  | 1751 |
| Query | 1140 | CTGACTGACTTACACCCCAAATTGAGGAGTTGCTCTATAGCAAAGAGGACAATAATGAG   | 1199 |
|       |      |                                                               |      |
| Sbjct | 1750 | CTGACTGACTTACACCCCAAATTGAGGAGTTGCTCTATAGCAAAGAGGACAATAATGAG   | 1691 |
| Query | 1200 | CATATGTAAGTACATCCCTTGGGAAGCATATCCAGTATGCAGGATCttttttttttACAG  | 1259 |
|       |      |                                                               |      |
| Sbjct | 1690 | CATATGTAAGTACATCCCTTGGGAAGCATATCCAGTATGCAGGATCttttttttttACAG  | 1631 |
| Query | 1260 | CATTGCTTTATTAACAACCTCGCATCACATGTGGTATGATTAAATCAGAGGGCACCTAGCA | 1319 |
|       |      |                                                               |      |
| Sbjct | 1630 | CATTGCTTTATTAACAACCTCGCATCACATGTGGTATGATTAAATCAGAGGGCACCTAGCA | 1571 |
| Query | 1320 | GACAGGAGTAAGCCAATCATCTTTTCAATGGCAAGACTTGACAAGATAAAGAACATCACA  | 1379 |
|       |      |                                                               |      |
| Sbjct | 1570 | GACAGGAGTAAGCCAATCATCTTTTCAATGGCAAGACTTGACAAGATAAAGAACATCACA  | 1511 |



|       |      |                                                               |      |
|-------|------|---------------------------------------------------------------|------|
| Query | 2160 | TCTATGGTTGAAGTTACACGTGGCAGATCTATGCAACCAAAGTTCTGAACATGGCATCAA  | 2219 |
|       |      |                                                               |      |
| Sbjct | 730  | TCTATGGTTGAAGTTACACGTGGCAGATCTATGCAACCAAAGTTCTGAACATGGCATCAA  | 671  |
| Query | 2220 | TATATGGCTTCTGGAGGACTCTAGACAAGGAAGAAAGACAAGCTAAACAGCACTACCTAC  | 2279 |
|       |      |                                                               |      |
| Sbjct | 670  | TATATGGCTTCTGGAGGACTCTAGACAAGGAAGAAAGACAAGCTAAACAGCACTACCTAC  | 611  |
| Query | 2280 | ACATGTTCTATAATCTTCAATTTAGGAAGTTGTGAGTTTAGGACCAGTGCAAGACAAAC   | 2339 |
|       |      |                                                               |      |
| Sbjct | 610  | ACATGTTCTATAATCTTCAATTTAGGAAGTTGTGAGTTTAGGACCAGTGCAAGACAAAC   | 551  |
| Query | 2340 | AATATGCTGAAAATCTATGAATATATTTTGTTCATTTCTTTCAATTTTTCAGGCAAAGAA  | 2399 |
|       |      |                                                               |      |
| Sbjct | 550  | AATATGCTGAAAATCTATGAATATATTTTGTTCATTTCTTTCAATTTTTCAGGCAAAGAA  | 491  |
| Query | 2400 | TGTGCCAACACTGGGCGAACCAACCAGCACAACCTACAGAGAGCGCAGAGCCTAATAGGAT | 2459 |
|       |      |                                                               |      |
| Sbjct | 490  | TGTGCCAACACTGGGCGAACCAACCAGCACAACCTACAGAGAGCGCAGAGCCTAATAGGAT | 431  |
| Query | 2460 | CATACCAAGACCCAAAGAAAGGCAAGTGTGCCATTCTTACGAAATTTACTGAAGAAAGA   | 2519 |
|       |      |                                                               |      |
| Sbjct | 430  | CATACCAAGACCCAAAGAAAGGCAAGTGTGCCATTCTTACGAAATTTACTGAAGAAAGA   | 371  |
| Query | 2520 | GACAGGGAACAACCTGACTGAAACATTTGTCGTTTGAGCGCTGCAGAAGGACGCAAATAAG | 2579 |
|       |      |                                                               |      |
| Sbjct | 370  | GACAGGGAACAACCTGACTGAAACATTTGTCGTTTGAGCGCTGCAGAAGGACGCAAATAAG | 311  |
| Query | 2580 | GATCCAGAGGTGAGAATTCAGCACTGATGAAGCTGCAAAAACAGCAAACAGAGAGCAT    | 2639 |
|       |      |                                                               |      |
| Sbjct | 310  | GATCCAGAGGTGAGAATTCAGCACTGATGAAGCTGCAAAAACAGCAAACAGAGAGCAT    | 251  |
| Query | 2640 | CACTCCAGACTGAGATATTAATCCATTAATATACTGTTGTGTCATGCAGGATTGCAACCA  | 2699 |
|       |      |                                                               |      |
| Sbjct | 250  | CACTCCAGACTGAGATATTAATCCATTAATATACTGTTGTGTCATGCAGGATTGCAACCA  | 191  |
| Query | 2700 | ACTTACTTGGACCACTGCTCCCAGCCTCCAATTTCTCAACAGATGGAGCTTGAAGTAGAG  | 2759 |
|       |      |                                                               |      |
| Sbjct | 190  | ACTTACTTGGACCACTGCTCCCAGCCTCCAATTTCTCAACAGATGGAGCTTGAAGTAGAG  | 131  |
| Query | 2760 | ACCAATCGTCAGAACTTTCTGAAGTTGTTGGAGTGAGAAATGTATTGTATAACATTGATT  | 2819 |
|       |      |                                                               |      |
| Sbjct | 130  | ACCAATCGTCAGAACTTTCTGAAGTTGTTGGAGTGAGAAATGTATTGTATAACATTGATT  | 71   |
| Query | 2820 | GTGAAGATTTAATAAATGATTACTGTGGGAATAATAAAAAGATTAACATACTTGGTAGCA  | 2879 |
|       |      |                                                               |      |
| Sbjct | 70   | GTGAAGATTTAATAAATGATTACTGTGGGAATAATAAAAAGATTAACATACTTGGTAGCA  | 11   |
| Query | 2880 | CTGACTACTT                                                    | 2889 |
|       |      |                                                               |      |
| Sbjct | 10   | CTGACTACTT                                                    | 1    |

**Table of SNPs and InDels in Os02t0831500-01**

|                   | cds | 5' UTR | 3'UTR | Introns |
|-------------------|-----|--------|-------|---------|
| No. of variants:1 | 0   | 0      | 0     | 1       |
| No. of SNPs: 0    | 0   | 0      | 0     | 0       |
| No.of InDels: 1   | 0   | 0      | 0     | 1       |

**S.No: 16**

**C10: Os06t0229800-01**

**Query: KMR3: scaffold1456\_size29059**

**Subject: IL50-13: scaffold8945\_size9534**

| Score           | Expect                                                         | Identities      | Gaps        | Strand     |
|-----------------|----------------------------------------------------------------|-----------------|-------------|------------|
| 6684 bits(3619) | 0.0                                                            | 3621/3622 (99%) | 0/3622 (0%) | Plus/Minus |
| Query 870       | AACCCGATCAGCGGCACGTCGTCGCGCACCTCCAGCCCCAGCTCGCGCTGCAGCGCCGCC   |                 |             | 929        |
| Sbjct 3623      | AACCCGATCAGCGGCACGTCGTCGCGCACCTCCAGCCCCGGCTCGCGCTGCAGCGCCGCC   |                 |             | 3564       |
| Query 930       | TTGCACCGCGGGCTTGCCGGAGTCCAGCGAGGCCACGGTGTAGTTGGCGTAGCCGTCCGGAC |                 |             | 989        |
| Sbjct 3563      | TTGCACCGCGGGCTTGCCGGAGTCCAGCGAGGCCACGGTGTAGTTGGCGTAGCCGTCCGGAC |                 |             | 3504       |
| Query 990       | TGCAGGTGCACGTCCACCTCCGGGTTCCACTCCCGGTAGTCGATGCCGTTACAGATGCCG   |                 |             | 1049       |
| Sbjct 3503      | TGCAGGTGCACGTCCACCTCCGGGTTCCACTCCCGGTAGTCGATGCCGTTACAGATGCCG   |                 |             | 3444       |
| Query 1050      | TTCATCTTCCAGTCGTTCTCCCGTATGATGTCGTGGAGGCCCCAGCCGCCCTCCGTCCGTC  |                 |             | 1109       |
| Sbjct 3443      | TTCATCTTCCAGTCGTTCTCCCGTATGATGTCGTGGAGGCCCCAGCCGCCCTCCGTCCGTC  |                 |             | 3384       |
| Query 1110      | TTCAGCTCCCAGAGGTAGCCGGGGCTCACGGTCACCACCCGGTCCGCCATCTTCAGGCC    |                 |             | 1169       |
| Sbjct 3383      | TTCAGCTCCCAGAGGTAGCCGGGGCTCACGGTCACCACCCGGTCCGCCATCTTCAGGCC    |                 |             | 3324       |
| Query 1170      | GCGCCGAAGATGTTGGCGTGCTCGCCGCCGACGGGGTCGTACAGCTTGAAGTGATCCAGG   |                 |             | 1229       |
| Sbjct 3323      | GCGCCGAAGATGTTGGCGTGCTCGCCGCCGACGGGGTCGTACAGCTTGAAGTGATCCAGG   |                 |             | 3264       |
| Query 1230      | TAGTGCTCCGGCAATTCCATGTAGGGGAATTCATCTACTGGGCCACGGCCCTACAAACAT   |                 |             | 1289       |
| Sbjct 3263      | TAGTGCTCCGGCAATTCCATGTAGGGGAATTCATCTACTGGGCCACGGCCCTACAAACAT   |                 |             | 3204       |
| Query 1290      | TACACGAACCATTTAGCATCACaaaaaaGTACTCCCCGGCACGTTTCATATTGTAAATT    |                 |             | 1349       |
| Sbjct 3203      | TACACGAACCATTTAGCATCACAAAAAAGTACTCCCCGGCACGTTTCATATTGTAAATT    |                 |             | 3144       |
| Query 1350      | GTTTTGATAttttttAAGTTAAACAGTTTTAAATTTAATTAGTTTATAGAAAAATATAA    |                 |             | 1409       |
| Sbjct 3143      | GTTTTGATATTTTTTAAAGTTAAACAGTTTTAAATTTAATTAGTTTATAGAAAAATATAA   |                 |             | 3084       |
| Query 1410      | TAACATTTCCAATACAAAACAAACATATAATCAAATTACATTAACATTATATTTAATTA    |                 |             | 1469       |
| Sbjct 3083      | TAACATTTCCAATACAAAACAAACATATAATCAAATTACATTAACATTATATTTAATTA    |                 |             | 3024       |
| Query 1470      | AACTAATTTGATGTTATAGATGCTGTTAAATTTTTCTATAAATTTAATCAAACGTAAAGA   |                 |             | 1529       |
| Sbjct 3023      | AACTAATTTGATGTTATAGATGCTGTTAAATTTTTCTATAAATTTAATCAAACGTAAAGA   |                 |             | 2964       |

|       |      |                                                               |      |
|-------|------|---------------------------------------------------------------|------|
| Query | 1530 | TGTTTGATTGGaaaaaaaaCGACTTATAAATTATAATATGAAACGAAGAAAGTGCTGAAC  | 1589 |
|       |      |                                                               |      |
| Sbjct | 2963 | TGTTTGATTGGAAAAAAAAACGACTTATAAATTATAATATGAAACGAAGAAAGTGCTGAAC | 2904 |
| Query | 1590 | TAAAAGTAGTAATAGACTGAAGAAGAGTTTATCGTGTCCCTGCTCAATAATTACCATGAC  | 1649 |
|       |      |                                                               |      |
| Sbjct | 2903 | TAAAAGTAGTAATAGACTGAAGAAGAGTTTATCGTGTCCCTGCTCAATAATTACCATGAC  | 2844 |
| Query | 1650 | CCACAATTTGTGCACTCAACTAATTTCTCTAACAAACAGCAGGAGATGCATACAAATAGA  | 1709 |
|       |      |                                                               |      |
| Sbjct | 2843 | CCACAATTTGTGCACTCAACTAATTTCTCTAACAAACAGCAGGAGATGCATACAAATAGA  | 2784 |
| Query | 1710 | ATAAAGATGATTCATTAGGGAGGAGAGAAAAACAAACCTGGTAAGCGATATTATGTATC   | 1769 |
|       |      |                                                               |      |
| Sbjct | 2783 | ATAAAGATGATTCATTAGGGAGGAGAGAAAAACAAACCTGGTAAGCGATATTATGTATC   | 2724 |
| Query | 1770 | ACAAGGACAGAGCGAGTGTACTGCATCATGCCATTGTCTCTGTAATATGCCTTCAGATAA  | 1829 |
|       |      |                                                               |      |
| Sbjct | 2723 | ACAAGGACAGAGCGAGTGTACTGCATCATGCCATTGTCTCTGTAATATGCCTTCAGATAA  | 2664 |
| Query | 1830 | ACAGGCAGGAGTGCAGTGTGCCAATCGTTTGCAAGGAACACCAAGTTGCCATCCCCATAG  | 1889 |
|       |      |                                                               |      |
| Sbjct | 2663 | ACAGGCAGGAGTGCAGTGTGCCAATCGTTTGCAAGGAACACCAAGTTGCCATCCCCATAG  | 2604 |
| Query | 1890 | GGCACACCACCGCATGGAACGTGCCAAGGAACCTGCCGATTGTACAGAAACAGAAAATAT  | 1949 |
|       |      |                                                               |      |
| Sbjct | 2603 | GGCACACCACCGCATGGAACGTGCCAAGGAACCTGCCGATTGTACAGAAACAGAAAATAT  | 2544 |
| Query | 1950 | AGCCCTTTGTAGGGAAACATATGACAACATTGGCAAGAGCATTGCATATTACGAACTGTA  | 2009 |
|       |      |                                                               |      |
| Sbjct | 2543 | AGCCCTTTGTAGGGAAACATATGACAACATTGGCAAGAGCATTGCATATTACGAACTGTA  | 2484 |
| Query | 2010 | GCAGGTTGAAATGCTGCTAGAGGTATCGAAGGAGTTCATCCGTGTATTTGGCGATAATGT  | 2069 |
|       |      |                                                               |      |
| Sbjct | 2483 | GCAGGTTGAAATGCTGCTAGAGGTATCGAAGGAGTTCATCCGTGTATTTGGCGATAATGT  | 2424 |
| Query | 2070 | GTAATATATTTAAAATAAAAAAGAATATGAATCTCTGTGAAATCTTGCAAGAAACATTTAC | 2129 |
|       |      |                                                               |      |
| Sbjct | 2423 | GTAATATATTTAAAATAAAAAAGAATATGAATCTCTGTGAAATCTTGCAAGAAACATTTAC | 2364 |
| Query | 2130 | GGGCTGTTTGTGTTGAGGGATCAAATTCAAATCATCTACTGCGACCTCATTCTCCTACTT  | 2189 |
|       |      |                                                               |      |
| Sbjct | 2363 | GGGCTGTTTGTGTTGAGGGATCAAATTCAAATCATCTACTGCGACCTCATTCTCCTACTT  | 2304 |
| Query | 2190 | ATTGTGTGCTTCAGTCCAAAAGTTAATACACTTCTTCTATTTATCAACAGAAAAAATGAT  | 2249 |
|       |      |                                                               |      |
| Sbjct | 2303 | ATTGTGTGCTTCAGTCCAAAAGTTAATACACTTCTTCTATTTATCAACAGAAAAAATGAT  | 2244 |
| Query | 2250 | TTGTGCTTTTGACCATTCCCTCAAACCAAACAATACATCTCATTCCCTAAAACCAAATTA  | 2309 |
|       |      |                                                               |      |
| Sbjct | 2243 | TTGTGCTTTTGACCATTCCCTCAAACCAAACAATACATCTCATTCCCTAAAACCAAATTA  | 2184 |

|       |      |                                                               |      |
|-------|------|---------------------------------------------------------------|------|
| Query | 2310 | TGATTGATAATGGAGTTGGAGAAAATACCTCAACAGCAGCCTTACAAAACAGAATCATGC  | 2369 |
|       |      |                                                               |      |
| Sbjct | 2183 | TGATTGATAATGGAGTTGGAGAAAATACCTCAACAGCAGCCTTACAAAACAGAATCATGC  | 2124 |
| Query | 2370 | GCTTCATGATTTCCTGAATGAAAATGGGAATGGGTAAGCATTTCAAATCAGTACGCCTA   | 2429 |
|       |      |                                                               |      |
| Sbjct | 2123 | GCTTCATGATTTCCTGAATGAAAATGGGAATGGGTAAGCATTTCAAATCAGTACGCCTA   | 2064 |
| Query | 2430 | GGAGATGCAACTTAAGTTTTACTAATGCAATGTAATACCAAACAGATAGAAGCTTCACCT  | 2489 |
|       |      |                                                               |      |
| Sbjct | 2063 | GGAGATGCAACTTAAGTTTTACTAATGCAATGTAATACCAAACAGATAGAAGCTTCACCT  | 2004 |
| Query | 2490 | GTCTGTTCCCCCATAGATGTCATCCTGACGGTGACGGAAGAGAGGAGCGTCAATGAACA   | 2549 |
|       |      |                                                               |      |
| Sbjct | 2003 | GTCTGTTCCCCCATAGATGTCATCCTGACGGTGACGGAAGAGAGGAGCGTCAATGAACA   | 1944 |
| Query | 2550 | CAAAATCAACTCCATCGATAAATGCATGGAAATATTTCACTTCCAGATCCTGCAGGCCAA  | 2609 |
|       |      |                                                               |      |
| Sbjct | 1943 | CAAAATCAACTCCATCGATAAATGCATGGAAATATTTCACTTCCAGATCCTGCAGGCCAA  | 1884 |
| Query | 2610 | AATAAAAACCAATTACTAAGGAATTTGCGTCTCCTATGCCAGTCTTCTTGGATTGCATTG  | 2669 |
|       |      |                                                               |      |
| Sbjct | 1883 | AATAAAAACCAATTACTAAGGAATTTGCGTCTCCTATGCCAGTCTTCTTGGATTGCATTG  | 1824 |
| Query | 2670 | TTGACACACACCTGTCCAGCAGCCTTGTAGTATTTCTGATTCTACATCCTGGGCTTCC    | 2729 |
|       |      |                                                               |      |
| Sbjct | 1823 | TTGACACACACCTGTCCAGCAGCCTTGTAGTATTTCTGATTCTACATCCTGGGCTTCC    | 1764 |
| Query | 2730 | GCGTAATCACCGTACCTTGGTACCACAACTTAAGATTGAAAGATGCATTTGCCAGTTATC  | 2789 |
|       |      |                                                               |      |
| Sbjct | 1763 | GCGTAATCACCGTACCTTGGTACCACAACTTAAGATTGAAAGATGCATTTGCCAGTTATC  | 1704 |
| Query | 2790 | AGTTTATATCAGGAAGTCACCGAGAGTCCCCGTTTCCGATTTCTGAATACGTTGTGGTTT  | 2849 |
|       |      |                                                               |      |
| Sbjct | 1703 | AGTTTATATCAGGAAGTCACCGAGAGTCCCCGTTTCCGATTTCTGAATACGTTGTGGTTT  | 1644 |
| Query | 2850 | ATATTATTACCATAACTAAAATTGCTAaaaaaaaaaTTGCTACATTTCTCTACTATCTTAA | 2909 |
|       |      |                                                               |      |
| Sbjct | 1643 | ATATTATTACCATAACTAAAATTGCTAaaaaaaaaaTTGCTACATTTCTCTACTATCTTAA | 1584 |
| Query | 2910 | AAGCGAAGTTGTCTTCCTTCCATCCCCTCCTCCCAACGCGTGCAGCGTGTCCATATGCGA  | 2969 |
|       |      |                                                               |      |
| Sbjct | 1583 | AAGCGAAGTTGTCTTCCTTCCATCCCCTCCTCCCAACGCGTGCAGCGTGTCCATATGCGA  | 1524 |
| Query | 2970 | AAAGTAACTACCGTCGCTCCCTAATTATAAGGGCCTAGTTCGTTAACGGTCTCCTAATCT  | 3029 |
|       |      |                                                               |      |
| Sbjct | 1523 | AAAGTAACTACCGTCGCTCCCTAATTATAAGGGCCTAGTTCGTTAACGGTCTCCTAATCT  | 1464 |
| Query | 3030 | ATCCCTAATTGTATGGGCCTGATCCGTTATCATGTACAGGTATGTAAGTGTAACTAA     | 3089 |
|       |      |                                                               |      |
| Sbjct | 1463 | ATCCCTAATTGTATGGGCCTGATCCGTTATCATGTACAGGTATGTAAGTGTAACTAA     | 1404 |



|       |      |                                                               |      |
|-------|------|---------------------------------------------------------------|------|
| Query | 3090 | GAGAACTACTTTTGGCACTAGTTTCCATGGCCACGTGATGATCTAAGCGGCTACGCCATA  | 3149 |
|       |      |                                                               |      |
| Sbjct | 1403 | GAGAACTACTTTTGGCACTAGTTTCCATGGCCACGTGATGATCTAAGCGGCTACGCCATA  | 1344 |
| Query | 3150 | GTGTATATATTTTCAACAGCATGTTAGAAATGAACATTTCTGTAACAATAGTAAGCAATT  | 3209 |
|       |      |                                                               |      |
| Sbjct | 1343 | GTGTATATATTTTCAACAGCATGTTAGAAATGAACATTTCTGTAACAATAGTAAGCAATT  | 1284 |
| Query | 3210 | TAGCTTTCAAGTACAGATTTGCAAATTTATCAATATTACTTTTGTATTTTGAATCTAACA  | 3269 |
|       |      |                                                               |      |
| Sbjct | 1283 | TAGCTTTCAAGTACAGATTTGCAAATTTATCAATATTACTTTTGTATTTTGAATCTAACA  | 1224 |
| Query | 3270 | GCTGGAGTAGCCTTTTAAATTTGCCATCATGATTATGTAAACAAAAGAACATAAGAGAAC  | 3329 |
|       |      |                                                               |      |
| Sbjct | 1223 | GCTGGAGTAGCCTTTTAAATTTGCCATCATGATTATGTAAACAAAAGAACATAAGAGAAC  | 1164 |
| Query | 3330 | TAATCTGCTTTACATTTGATCCAAATTTATATATCTGAAAATATACGTTAATTAAATGAT  | 3389 |
|       |      |                                                               |      |
| Sbjct | 1163 | TAATCTGCTTTACATTTGATCCAAATTTATATATCTGAAAATATACGTTAATTAAATGAT  | 1104 |
| Query | 3390 | CAAATCTGTAAGAATGGAAGAAACATCCAACCATGAAGGAGAGAAAAAGGAGTAATACC   | 3449 |
|       |      |                                                               |      |
| Sbjct | 1103 | CAAATCTGTAAGAATGGAAGAAACATCCAACCATGAAGGAGAGAAAAAGGAGTAATACC   | 1044 |
| Query | 3450 | ATAACACGATGTCCTCTCCTCGCCAAAGCTTTGGGTAAAGCACCTGCAACATCTCCAAGC  | 3509 |
|       |      |                                                               |      |
| Sbjct | 1043 | ATAACACGATGTCCTCTCCTCGCCAAAGCTTTGGGTAAAGCACCTGCAACATCTCCAAGC  | 984  |
| Query | 3510 | CCACCTGTGCAAATGCAACACTTGTTTCATATCAGTAACTGAAGCAAATTTACAAGATCAG | 3569 |
|       |      |                                                               |      |
| Sbjct | 983  | CCACCTGTGCAAATGCAACACTTGTTTCATATCAGTAACTGAAGCAAATTTACAAGATCAG | 924  |
| Query | 3570 | AAGAACaaaaaagagaaaaaaGAAGTATATATCGTGTACATGCCTGTTTTGCACCAGGGA  | 3629 |
|       |      |                                                               |      |
| Sbjct | 923  | AAGAACAAAAAAGAGAAAAAAGAAGTATATATCGTGTACATGCCTGTTTTGCACCAGGGA  | 864  |
| Query | 3630 | GAACATTCAGCAGCCACCACGATCACGTTTCATGACATTCTCCCCAGCCAAAGGGCCCGAA | 3689 |
|       |      |                                                               |      |
| Sbjct | 863  | GAACATTCAGCAGCCACCACGATCACGTTTCATGACATTCTCCCCAGCCAAAGGGCCCGAA | 804  |
| Query | 3690 | TCGTTCATCTGGTCGATCTCAGAATCTGACGCATCTGAATCAGCCAGTCATCATCGTCA   | 3749 |
|       |      |                                                               |      |
| Sbjct | 803  | TCGTTCATCTGGTCGATCTCAGAATCTGACGCATCTGAATCAGCCAGTCATCATCGTCA   | 744  |
| Query | 3750 | TCGCCATCTCCGCGGCGTCCGGTTCGTTTCAGATCAAAATATTTCTTGAAATCCCACGTC  | 3809 |
|       |      |                                                               |      |
| Sbjct | 743  | TCGCCATCTCCGCGGCGTCCGGTTCGTTTCAGATCAAAATATTTCTTGAAATCCCACGTC  | 684  |
| Query | 3810 | TCCTCTTCTACCGCAGGAATAGGGGAAGATCTAGTCGCCTTTGGCTTCGGAGCACTCTCA  | 3869 |
|       |      |                                                               |      |
| Sbjct | 683  | TCCTCTTCTACCGCAGGAATAGGGGAAGATCTAGTCGCCTTTGGCTTCGGAGCACTCTCA  | 624  |



**S.No: 17**

**D6: Os03t0407400-00**

**Query: KMR3: scaffold14776\_size6169**

**Subject: I150-13: scaffold6119\_size12184**

| Score          | Expect                                                         | Identities    | Gaps       | Strand     |
|----------------|----------------------------------------------------------------|---------------|------------|------------|
| 931 bits (504) | 0.0                                                            | 506/507 (99%) | 0/507 (0%) | Plus/Minus |
| Query 1        | GTAAAATAAATCAGCAATCACGTACTCATCATGGCAGCAAAGCCAAATTACAGATAACCG   | 60            |            |            |
| Sbjct 507      | GTAAAATAAATCAGCAATCACGTACTCATCATGGCAGCAAAGCCAAATTACAGATAACCG   | 448           |            |            |
| Query 61       | CAAGCAGAGCAAGGCAATCAACATATGCATCGATGAGGAACTAATTAACACCAGAACCTA   | 120           |            |            |
| Sbjct 447      | CAAGCAGAGCAAGGCAATCAACATATGCATCGATGAGGAACTAATTAACACCAGAACCTA   | 388           |            |            |
| Query 121      | GCTAGCTAATTAAGTACGCGCGCAGCTCGATCGATCATCATCGAGAACTAATTAATTAAC   | 180           |            |            |
| Sbjct 387      | GCTAGCTAATTAAGTACGCGCGCAGCTCGATCGATCATCATCGAGAACTAATTAATTAAC   | 328           |            |            |
| Query 181      | CAATCAGTGCAGCTTCGCTCAATCGATCGATCGATCACAAGCAggggggggCAGCAACGAG  | 240           |            |            |
| Sbjct 327      | CAATCAGTGCAGCTTCGCTCAATCGATCGATCGATCACAAGCAGGGGGGGCAGCAACGAG   | 268           |            |            |
| Query 241      | GGACGCCGCAGCAGCACCTGCACGCCGGGCACGCGCAGGAGCAGCCGCCGGggcacgggc   | 300           |            |            |
| Sbjct 267      | GGACGCCGCAGCAGCACCTGCACGCCGGGCACGCGCAGGAGCAGCCGCCGGGGGCACGGGC  | 208           |            |            |
| Query 301      | acgggcaggtgcagcggcagcagcatcccgcgcacggcggcgcgacgcagcgcacggcg    | 360           |            |            |
| Sbjct 207      | ACGGGCAGGTGCAGCGGCACGAGCATCCCGCGCACGGCGGCGCGCAGCACGCGCACGGCG   | 148           |            |            |
| Query 361      | gggagcagctgcagctcgcgcacgcgcggacgcgcagcgcgcgcagcagcagcgcagcggc  | 420           |            |            |
| Sbjct 147      | GGGAGCAGCTGCAGCTCGCGCACGCGCGGACGCCGACGCCGCCGCGCAGCAGCAGCGACGGC | 88            |            |            |
| Query 421      | agcagcagctgcggcggcggcagcgcACACGGACTCTTCGTTAACGCCGCCCCACATGAGG  | 480           |            |            |
| Sbjct 87       | AGCAGCAGCTGCGGCGGCGGCAGCGACACGGACTCTTCGTTAACGCCGCCCCACATGAGG   | 28            |            |            |
| Query 481      | AGGAGGAGGagcagcagcttgca                                        | 507           |            |            |
| Sbjct 27       | AGGAGGAGGAGGAGCAGCAGTTGCA                                      | 1             |            |            |

**Table of SNPs and InDels in Os03t0407400-00**

|                   | cds | 5' UTR | 3'UTR | Introns |
|-------------------|-----|--------|-------|---------|
| No. of variants:1 | 1   | 0      | 0     | 0       |
| No. of SNPs: 1    | 1   | 0      | 0     | 0       |
| No.of InDels: 0   | 0   | 0      | 0     | 0       |

**S.No: 18**

**D8: Os03t0117900-01**

**Query: KMR3: scaffold9265\_size10248**

**Subject: IL50-13: Scaffold21042\_size4123**

| Score          | Expect | Identities                                                     | Gaps       | Strand    |
|----------------|--------|----------------------------------------------------------------|------------|-----------|
| 819 bits (443) | 0.0    | 445/446 (99%)                                                  | 0/446 (0%) | Plus/Plus |
| Query 507      |        | cggaggccgcccgtcgccgcTGGGGCGGGCGATCAGAAGCGCGTCGTGGACGAGGACGAC   |            | 566       |
|                |        |                                                                |            |           |
| Sbjct 1        |        | CCGGAGGCCCGCCGTCGCCGCTGGAGCGGGCGATCAGAAGCGCGTCGTGGACGAGGACGAC  |            | 60        |
| Query 567      |        | GTCTTCGAGATGCCCGGGCTGCTGGTGGAGCATGGCCGAGGGCTTGATGATGAGCCC GCCG |            | 626       |
|                |        |                                                                |            |           |
| Sbjct 61       |        | GTCTTCGAGATGCCCGGGCTGCTGGTGGAGCATGGCCGAGGGCTTGATGATGAGCCC GCCG |            | 120       |
| Query 627      |        | AGGCTGAGCCCCTCGACGGACGGCGTCGGCGGCGTGTGCGCCGAGGACGACGAGGACGAG   |            | 686       |
|                |        |                                                                |            |           |
| Sbjct 121      |        | AGGCTGAGCCCCTCGACGGACGGCGTCGGCGGCGTGTGCGCCGAGGACGACGAGGACGAG   |            | 180       |
| Query 687      |        | GACGGCATGAGCCTGTGGAACCATTCCCTGAAATGGGCTTACGGGTGCATAGCATTTCAG   |            | 746       |
|                |        |                                                                |            |           |
| Sbjct 181      |        | GACGGCATGAGCCTGTGGAACCATTCCCTGAAATGGGCTTACGGGTGCATAGCATTTCAG   |            | 240       |
| Query 747      |        | GAGGACACCATGTATTTCCATGTGTTTCGTATGAATTCTGTGCCTACGTACAGTACGTAC   |            | 806       |
|                |        |                                                                |            |           |
| Sbjct 241      |        | GAGGACACCATGTATTTCCATGTGTTTCGTATGAATTCTGTGCCTACGTACAGTACGTAC   |            | 300       |
| Query 807      |        | TCGGCACGTATGCGAGATAGGAACGGAGCAGAGCAGGATACTGAATTTTATCGTAGTTGT   |            | 866       |
|                |        |                                                                |            |           |
| Sbjct 301      |        | TCGGCACGTATGCGAGATAGGAACGGAGCAGAGCAGGATACTGAATTTTATCGTAGTTGT   |            | 360       |
| Query 867      |        | CCTGTTACGTGTATACGGTATATATGGTCACTCCACTGATGTATAAACCATCCGTAGACG   |            | 926       |
|                |        |                                                                |            |           |
| Sbjct 361      |        | CCTGTTACGTGTATACGGTATATATGGTCACTCCACTGATGTATAAACCATCCGTAGACG   |            | 420       |
| Query 927      |        | AATTATGGCTGAAAACGATGCCCTG                                      |            | 952       |
|                |        |                                                                |            |           |
| Sbjct 421      |        | AATTATGGCTGAAAACGATGCCCTG                                      |            | 446       |

**Table of SNPs and InDels in Os03t0117900-01**

|                   | cds | 5' UTR | 3'UTR | Introns |
|-------------------|-----|--------|-------|---------|
| No. of variants:1 | 1   | 0      | 0     | 0       |
| No. of SNPs: 1    | 1   | 0      | 0     | 0       |
| No.of InDels: 0   | 0   | 0      | 0     | 0       |

**S.No: 19**

**D19: Os08t0509600-01**

**Query: KMR3: scaffold3452\_size19961**

**Subject: IL50-13: scaffold2693\_size19548**

Score Expect Identities Gaps Strand  
6571 bits (3558) 0.0 3566/3570 (99%) 0/3570 (0%) Plus/Plus

|       |     |                                                                            |     |
|-------|-----|----------------------------------------------------------------------------|-----|
| Query | 1   | TTCCGtctctttcctctctctctctctctccccctctcCTggaggagagagaggagaagag              | 60  |
| Sbjct | 1   | TTCCGTCTCTTTTCCTCTCTTCTCTCTCTCCCCCTCTCCTGGAGGAGAGAGAGGAGAAGAG              | 60  |
| Query | 61  | gaggggggCCGCGCCAAGAGCCACGCGCGCTACAGTCTCCTTCCCACCCGCGACCGCGA                | 120 |
| Sbjct | 61  | GAGGGGGGGCCGCGCCAAGAGCCACGCGCGCTACAGTCTCCTTCCCACCCGCGACCGCGA               | 120 |
| Query | 121 | GCAATGGAGATGGCCAGTGGAGGAGGcgccgcccgcgcccgcgGCGGCGGAGTAGGCGGC               | 180 |
| Sbjct | 121 | GCAATGGAGATGGCCAGTGGAGGAGGCGCCGCCCGCCGCCCGCGGCGGAGTAGGCGGC                 | 180 |
| Query | 181 | AGCGGCGGCGGTGGTGGTGGAGGGGACGAGCACCGCCAGCTGCACGGTCTCAAGTTCGGC               | 240 |
| Sbjct | 181 | AGCGGCGGCGGTGGTGGTGGAGGGGACGAGCACCGCCAGCTGCACGGTCTCAAGTTCGGC               | 240 |
| Query | 241 | AAGAAGATCTACTTCGAGGAcgcccgcgcccgcgcccgcgTCCCTCGTCTTCCAAGGCGGCGGGTGGTGGACGC | 300 |
| Sbjct | 241 | AAGAAGATCTACTTCGAGGACGCCGCCCGCGGCAGCAGGCGGCGGCGGCACTGGCAGTGGC              | 300 |
| Query | 301 | agtggcagcgcgagcgcgcccgcgcccgcgTCCTCGTCTTCCAAGGCGGCGGGTGGTGGACGC            | 360 |
| Sbjct | 301 | AGTGGCAGCGGAGCGCCGCCCGCGTCTCGTCTTCCAAGGCGGCGGGTGGTGGACGC                   | 360 |
| Query | 361 | GGCGGAGGGGGCAAGAACAAGGGGAAGGGCGTGGCCGCGGCGGCCAccgcccgcgcccg                | 420 |
| Sbjct | 361 | GGCGGAGGGGGCAAGAACAAGGGGAAGGGCGTGGCCGCGGCGGCCACCGCCGCCGCCG                 | 420 |
| Query | 421 | ccgcccgcgGGTGCCAGGTGGAGGGGTGCGGCGCGGATCTGAGCGGGATCAAGAACTAC                | 480 |
| Sbjct | 421 | CCGCCGCCCGGTGCCAGGTGGAGGGGTGCGGCGCGGATCTGAGCGGGATCAAGAACTAC                | 480 |
| Query | 481 | TACTGCCGCCACAAGGTGTGCTTCATGCATTCCAAGGCTCCCCGCGTCGTGTCGCCGGC                | 540 |
| Sbjct | 481 | TACTGCCGCCACAAGGTGTGCTTCATGCATTCCAAGGCTCCCCGCGTCGTGTCGCCGGC                | 540 |

|       |      |                                    |                              |                           |     |
|-------|------|------------------------------------|------------------------------|---------------------------|-----|
| Query | 541  | CTCGAGCAGCGCTTCTGCCAGCAGTGCAGCAG   | GTC                          | ACTCTCTCACTCACCTCGCCATTGC | 600 |
|       |      |                                    |                              |                           |     |
| Sbjct | 541  | CTCGAGCAGCGCTTCTGCCAGCAGTGCAGCAG   | GTC                          | ACTCTCTCACTCACCTCGCCATTGC | 600 |
| Query | 601  | TGATGTCACCACTGCTTTTGCTTTGCTTTGCTT  | GCTCTCCCTCCTCTTTCACCTATCTCT  | 660                       |     |
|       |      |                                    |                              |                           |     |
| Sbjct | 601  | TGATGTCACCACTGCTTTTGCTTTGCTTTGCTT  | GCTCTCCCTCCTCTTTCACCTATCTCT  | 660                       |     |
| Query | 661  | CTTGTTTATTTGCTTCTTGTTCTTGTTTAGTGCT | AGTACAtgtggttgttattggttgcc   | 720                       |     |
|       |      |                                    |                              |                           |     |
| Sbjct | 661  | CTTGTTTATTTGCTTCTTGTTCTTGTTTAGTGCT | AGTACATGTGTTGTTATTGTTGTGCC   | 720                       |     |
| Query | 721  | gTTTTgtcTTTTgggTtattgtgTtGttgTt    | ACTACTCGTTTTACTATAGGTTTTAAGG | 780                       |     |
|       |      |                                    |                              |                           |     |
| Sbjct | 721  | GTTTTGTCTTTTGGGTtATTGTGTTGTTGTT    | ACTACTCGTTTTACTATAGGTTTTAAGG | 780                       |     |
| Query | 781  | TTTATGAGCACGGCCACCACATTAGATGCACTGT | CAAGTGGTGTGTGTGGGACCTTTCCT   | 840                       |     |
|       |      |                                    |                              |                           |     |
| Sbjct | 781  | TTTATGAGCACGGCCACCACATTAGATGCACTGT | CAAGTGGTGTGTGTGGGACCTTTCCT   | 840                       |     |
| Query | 841  | GCTAAAACAAGCTGATTTCAACTCTCTGAAACT  | TCCTGCATTTTCATCTATTTTTATCTTT | 900                       |     |
|       |      |                                    |                              |                           |     |
| Sbjct | 841  | GCTAAAACAAGCTGATTTCAACTCTCTGAAACT  | TCCTGCATTTTCATCTATTTTTATCTTT | 900                       |     |
| Query | 901  | GATTGTGTTGGGAGTACTACACTAGTAGTGTTA  | ATATTTTGACTGGTGCTTATGAGATTT  | 960                       |     |
|       |      |                                    |                              |                           |     |
| Sbjct | 901  | GATTGTGTTGGGAGTACTACACTAGTAGTGTTA  | ATATTTTGACTGGTGCTTATGAGATTT  | 960                       |     |
| Query | 961  | TTAAGTTGGTAGGTTGATGAGGAAAATACTCCT  | TTTATATGGTTGAGTGATGTGACTTGCC | 1020                      |     |
|       |      |                                    |                              |                           |     |
| Sbjct | 961  | TTAAGTTGGTAGGTTGATGAGGAAAATACTCCT  | TTTATATGGTTGAGTGATGTGACTTGCC | 1020                      |     |
| Query | 1021 | TGTCTGCCTGCCTGCCTGCCGCTTTCATAAGAT  | TCCTCTGTGTTAGTAAGAGCCACTGT   | 1080                      |     |
|       |      |                                    |                              |                           |     |
| Sbjct | 1021 | TGTCTGCCTGCCTGCCTGCCGCTTTCATAAGAT  | TCCTCTGTGTTAGTAAGAGCCACTGT   | 1080                      |     |
| Query | 1081 | TTATTTGTACTGGTGCTTACTCTACTTAGTTA   | ATTAGCCATTAGCTATAAAAATTCGTTG | 1140                      |     |
|       |      |                                    |                              |                           |     |
| Sbjct | 1081 | TTATTTGTACTGGTGCTTACTCTACTTAGTTA   | ATTAGCCATTAGCTATAAAAATTCGTTG | 1140                      |     |
| Query | 1141 | ATGTTGCAAGCTTAGCAATGGCCACGGTAAGA   | ATGGGAGAGAGAAGTTGGCTAAAGCTGT | 1200                      |     |
|       |      |                                    |                              |                           |     |
| Sbjct | 1141 | ATGTTGCAAGCTTAGCAATGGCCACGGTAAGA   | ATGGGAGAGAGAAGTTGGCTAAAGCTGT | 1200                      |     |
| Query | 1201 | TGCTTTGTAGTTTGTACTATATATGTGTCTTT   | GTGTTGCAAGATATGCAACTCCTACTAT | 1260                      |     |
|       |      |                                    |                              |                           |     |
| Sbjct | 1201 | TGCTTTGTAGTTTGTACTATATATGTGTCTTT   | GTGTTGCAAGATATGCAACTCCTACTAT | 1260                      |     |

|       |      |                                                                |      |
|-------|------|----------------------------------------------------------------|------|
| Query | 1261 | GCTGTGACTTGAGCTCAAGGTTTTTCAGTTATCTATAGATCCTTACTACTACTGAGCATACT | 1320 |
|       |      |                                                                |      |
| Sbjct | 1261 | GCTGTGACTTGAGCTCAAGGTTTTTCAGTTATCTATAGATCCTTACTACTACTGAGCATACT | 1320 |
| Query | 1321 | TACCACTTCTGTATGGTAGCATATGGTAGCATAGTCCAAGTTCCAACGCCTCGCCAGTTG   | 1380 |
|       |      |                                                                |      |
| Sbjct | 1321 | TACCACTTCTGTATGGTAGCATATGGTAGCATAGTCCAAGTTCCAACGCCTCGCCAGTTG   | 1380 |
| Query | 1381 | TTCATAATCTATACTACCACTTCTGTGCATTTGTTACTTTTATTTAATAGTTTGTCTCAT   | 1440 |
|       |      |                                                                |      |
| Sbjct | 1381 | TTCATAATCTATACTACCACTTCTGTGCATTTGTTACTTTTATTTAATAGTTTGTCTCAT   | 1440 |
| Query | 1441 | TAGCTGACAAGCATATGCCTGTTTTGATATCTGCCCTCTTGTAATAGTCTATGGATAGC    | 1500 |
|       |      |                                                                |      |
| Sbjct | 1441 | TAGCTGACAAGCATATGCCTGTTTTGATATCTGCCCTCTTGTAATAGTCTATGGATAGC    | 1500 |
| Query | 1501 | TTGGACTGTTTGATGCTTTAATTTTTTACTAGCAACACTTAGGGCCCCTTTGAAATGGAG   | 1560 |
|       |      |                                                                |      |
| Sbjct | 1501 | TTGGACTGTTTGATGCTTTAATTTTTTACTAGCAACACTTAGGGCCCCTTTGAAATGGAG   | 1560 |
| Query | 1561 | GATTAGCAAAGGAATTTTGGAGGATTCATTTTCCTAAGGATTTTTTCCTATAGAGCCATT   | 1620 |
|       |      |                                                                |      |
| Sbjct | 1561 | GATTAGCAAAGGAATTTTGGAGGATTCATTTTCCTAAGGATTTTTTCCTATAGAGCCCTT   | 1620 |
| Query | 1621 | TGATTCATAGAAAGAGGATAGGAAAACCTCCGTAGGATTGCATTCCTATGATCAATTCCA   | 1680 |
|       |      |                                                                |      |
| Sbjct | 1621 | TGATTCATAGAAAGAGGATAGGAAAACCTCCGTAGGATTGCATTCCTATGATCAATTCCA   | 1680 |
| Query | 1681 | TAGGAAAATAAGCAAGAGGTTAGACCTCTTGTAAGACTTTTCCTTTGTTGAGTGTATCTTG  | 1740 |
|       |      |                                                                |      |
| Sbjct | 1681 | TAGGAAAATAAGCAAGAGGTTAGACCTCTTGTAAGACTTTTCCTTTGTTGAGTGTATCTTG  | 1740 |
| Query | 1741 | TGGTATAATCAAAGGGCTCTTCTCTCCATTTCTGTGTTTTCAATTCCTGTAGGATTGGA    | 1800 |
|       |      |                                                                |      |
| Sbjct | 1741 | TGGTATAATCAAAGGGCTCTTCTCTCCATTTCTGTGTTTTCAATTCCTGTAGGATTGGA    | 1800 |
| Query | 1801 | AAAACATACAACTTCAATTCCTACGTTTTTCCTATTCCTATGTTTTTCCTATCCTGCGTT   | 1860 |
|       |      |                                                                |      |
| Sbjct | 1801 | AAAACATACAACTTCAATTCCTACGTTTTTCCTATTCCTATGTTTTTCCTATCCTGCGTT   | 1860 |
| Query | 1861 | TCAAAGGGGCCCTTAAGGATGAAGGGAAGTAAGAGAAACATACTAGAGAATATGTAGTAG   | 1920 |
|       |      |                                                                |      |
| Sbjct | 1861 | TCAAAGGGGCCCTTAAGGATGAAGGGAAGTAAGAGAAACATACTAGAGAATATGTAGTAG   | 1920 |
| Query | 1921 | TATTTCTACATTCATATTTGTAGCACTAGCCCACAAATATCTTTGCCTTGTACTTACTT    | 1980 |
|       |      |                                                                |      |
| Sbjct | 1921 | TATTTCTACATTCATATTTGTAGCACTAGCCCACAAATATCTTTGCCTTGTACTTACTT    | 1980 |
| Query | 1981 | CATACCAGTTCCCCCTTTTCAGAGCAAACCAACAATTTCTGTTGCCTTATATATCTAGT    | 2040 |
|       |      |                                                                |      |
| Sbjct | 1981 | CATACCAGTTCCCCCTTTTCAGAGCAAACCAACAATTTCTGTTGCCTTATATATCTAGT    | 2040 |



|       |      |                                                              |                                                     |      |
|-------|------|--------------------------------------------------------------|-----------------------------------------------------|------|
| Query | 2041 | GTCTTCGTA                                                    | CTAATATATCTGTTCCAAAATGTACCTGTCCAAATTCATAGCTAGAAATAG | 2100 |
|       |      |                                                              |                                                     |      |
| Sbjct | 2041 | GTCTTCGTA                                                    | CTAATATATCTGTTCCAAAATGTACCTGTCCAAATTCATAGCTAGAAATAG | 2100 |
| Query | 2101 | CTTTATTTAGGACGGAAGTAATAACTGTTGTTAGAGACTTGGTTCAGACTTTTGGTTATG | 2160                                                |      |
|       |      |                                                              |                                                     |      |
| Sbjct | 2101 | CTTTATTTAGGACGGAAGTAATAACTGTTGTTAGAGACTTGGTTCAGACTTTTGGTTATG | 2160                                                |      |
| Query | 2161 | TTGAGGCTACTATCATTTCCTTTACGGGCCAAATTACTACAAATGAGAATTCATAAAAAT | 2220                                                |      |
|       |      |                                                              |                                                     |      |
| Sbjct | 2161 | TTGAGGCTACTATCATTTCCTTTACGGGCCAAATTACTACAAATGAGAATTCATAAAAAT | 2220                                                |      |
| Query | 2221 | GTCAAGATTTTATGATTGTTGTAGCTTTATTTAGGACGGAGGTAGTAATTGTTGTTAGAG | 2280                                                |      |
|       |      |                                                              |                                                     |      |
| Sbjct | 2221 | GTCAAGATTTTATGATTGTTGTAGCTTTATTTAGGACGGAGGTAGTAATTGTTGTTAGAG | 2280                                                |      |
| Query | 2281 | ACTTGGTTCAGACTTTTGGTTACGTTGAAGCTACTATCATTTCCTTTATGGTCAAATTAC | 2340                                                |      |
|       |      |                                                              |                                                     |      |
| Sbjct | 2281 | ACTTGGTTCAGACTTTTGGTTACGTTGAAGCTACTATCATTTCCTTTATGGTCAAATTAC | 2340                                                |      |
| Query | 2341 | TAACAATGAGTATTCATAAAAATGTCAAGATTTTATAATTGAGCTGTGCCAGTGCTAAGT | 2400                                                |      |
|       |      |                                                              |                                                     |      |
| Sbjct | 2341 | TAACAATGAGTATTCATAAAAATGTCAAGATTTTATAATTGAGCTGTGCCAGTGCTAAGT | 2400                                                |      |
| Query | 2401 | GTGTCACTATCTGATGCCATAATGCATCATTATAAAAGCCAGATGGACCATTAGCTTTTA | 2460                                                |      |
|       |      |                                                              |                                                     |      |
| Sbjct | 2401 | GTGTCACTATCTGATGCCATAATGCATCATTATAAAAGCCAGATGGACCATTAGCTTTTA | 2460                                                |      |
| Query | 2461 | TGTGTAGGACACCTGCCGTCCAATTAGATGGATAACCATCTAGTGTTTGTGTACTGTTAT | 2520                                                |      |
|       |      |                                                              |                                                     |      |
| Sbjct | 2461 | TGTGTAGGACACCTGCCGTCCAATTAGATGGATAACCATCTAGTGTTTGTGTACTGTTAT | 2520                                                |      |
| Query | 2521 | TTTAAGCCCACATCTCACAACCTCCATGAATGATTACAGTCTTCCTTTACATGGTGTCC  | 2580                                                |      |
|       |      |                                                              |                                                     |      |
| Sbjct | 2521 | TTTAAGCCCACATCTCACAACCTCCATGAATGATTACAGTCTTCCTTTACATGGTGTCC  | 2580                                                |      |
| Query | 2581 | TTTTGTTGTGTTAGGAATAGCATTTTTTATTTATGGGTGTAATTATGAAAGGCACTAGGA | 2640                                                |      |
|       |      |                                                              |                                                     |      |
| Sbjct | 2581 | TTTTGTTGTGTTAGGAATAGCATTTTTTATTTATGGGTGTAATTATGAAAGGCACTAGGA | 2640                                                |      |
| Query | 2641 | GAGTTGCTGCTTTATCTTGATGGGATTTGTAGTAATACCATCTTTAGGATGACAAGAAAT | 2700                                                |      |
|       |      |                                                              |                                                     |      |
| Sbjct | 2641 | GAGTTGCTGCTTTATCTTGATGGGATTTGTAGTAATACCATCTTTAGGATGACAAGAAAT | 2700                                                |      |
| Query | 2701 | CTTGTCTGAGTTAGCATGGGCTGCCTTTTGACCTGAGCTACGGTTTGCTATGTTGGCT   | 2760                                                |      |
|       |      |                                                              |                                                     |      |
| Sbjct | 2701 | CTTGTCTGAGTTAGCATGGGCTGCCTTTTGACCTGAGCTACGGTTTGCTATGTTGGCT   | 2760                                                |      |
| Query | 2761 | TGCATCATGCAGATCTATTAGGATAATAAGCATATAAAAGTTGCTTGCATTGTGCATTGC | 2820                                                |      |
|       |      |                                                              |                                                     |      |
| Sbjct | 2761 | TGCATCATGCAGATCTATTAGGATAATAAGCATATAAAAGTTGCTTGCATTGTGCATTGC | 2820                                                |      |

|       |      |                                                               |      |
|-------|------|---------------------------------------------------------------|------|
| Query | 2821 | TTGTTTTACCTTGATTCATGTAGGAGTAATTTGCTCGCCATGCCTCGTTTTGCTTTCTGA  | 2880 |
|       |      |                                                               |      |
| Sbjct | 2821 | TTGTTTTACCTTGATTCATGTAGGAGTAATTTGCTCGCCATGCCTCGTTTTGCTTTCTGA  | 2880 |
| Query | 2881 | GTCAACAGCCAAATTTAGATGATGTACCTTCTGTTGCTTCAAAAACCTCAGTCACTGCACA | 2940 |
|       |      |                                                               |      |
| Sbjct | 2881 | GTCAACAGCCAAATTTAGATGATGTACCTTCTGTTGCTTCAAAAACCTCAGTCACTGCACA | 2940 |
| Query | 2941 | GCAGCAGTGGATAGGATTCAGAATCAATCTATCCATGATTCTCTGTTACATAATATGAC   | 3000 |
|       |      |                                                               |      |
| Sbjct | 2941 | GCAGCAGTGGATAGGATTCAGAATCAATCTATCCATGATTCTCTGTTACATAATATGAC   | 3000 |
| Query | 3001 | AGGTTCCACCTGCTGCCTGAATTTGACCAAGGAAAACGCAGCTGCCGCAGACGCCTTGCA  | 3060 |
|       |      |                                                               |      |
| Sbjct | 3001 | AGGTTCCACCTGCTGCCTGAATTTGACCAAGGAAAACGCAGCTGCCGCAGACGCCTTGCA  | 3060 |
| Query | 3061 | GGTCATAATGAGCGCCGGAGGAGGCCGAAACCCCTTTGGCATCACGCTACGGTCGACTA   | 3120 |
|       |      |                                                               |      |
| Sbjct | 3061 | GGTCATAATGAGCGCCGGAGGAGGCCGAAACCCCTTTGGCATCACGCTACGGTCGACTA   | 3120 |
| Query | 3121 | GCTGCATCTGTTGGTG                                              | 3180 |
|       |      |                                                               |      |
| Sbjct | 3121 | GCTGCATCTGTTGGTG                                              | 3180 |
| Query | 3181 | TGGTAACTACTGGTTGCATTTCGCTGATGTGTTGTTTGTGCGATTCTTGATCCAGAAGAG  | 3240 |
|       |      |                                                               |      |
| Sbjct | 3181 | TGGTAACTACTGGTTGCATTTCGCTGATGTGTTGTTTGTGCGATTCTTGATCCAGAAGAG  | 3240 |
| Query | 3241 | CATCGCAGGTTTCAGAAGCTTTACGTTGGATTTCTCCTACCCAAGGGTTCCAAGCAGCGTA | 3300 |
|       |      |                                                               |      |
| Sbjct | 3241 | CATCGCAGGTTTCAGAAGCTTTACGTTGGATTTCTCCTACCCAAGGGTTCCAAGCAGCGTA | 3300 |
| Query | 3301 | AGGAATGCATGGCCAGCAATTC AACCAGGCGATCGGATCTCCGGTGGTATCCAGTGGCAC | 3360 |
|       |      |                                                               |      |
| Sbjct | 3301 | AGGAATGCATGGCCAGCAATTC AACCAGGCGATCGGATCTCCGGTGGTATCCAGTGGCAC | 3360 |
| Query | 3361 | AGGAACGTAGCTCCTCATGGTCACTCTAGTGCAGTGGCGGGATATGGTGCCAACACATAC  | 3420 |
|       |      |                                                               |      |
| Sbjct | 3361 | AGGAACGTAGCTCCTCATGGTCACTCTAGTGCAGTGGCGGGATATGGTGCCAACACATAC  | 3420 |
| Query | 3421 | AGCGGCCAAGGTAGCTCTTCTTCAGGGCCACCGGTGTTTCGCTGGCCCAAATCTCCCTCCA | 3480 |
|       |      |                                                               |      |
| Sbjct | 3421 | AGCGGCCAAGGTAGCTCTTCTTCAGGGCCACCGGTGTTTCGCTGGCCCAAATCTCCCTCCA | 3480 |
| Query | 3481 | GGTGGATGTCTCGCAGGGGTCGGTGCCGCCACCGACTCGAGCTGTGCTCTCTCTTCTG    | 3540 |
|       |      |                                                               |      |
| Sbjct | 3481 | GGTGGATGTCTCGCAGGGGTCGGTGCCGCCACCGACTCGAGCTGTGCTCTCTCTTCTG    | 3540 |
| Query | 3541 | TCAACCCAGCCATGGGATACTACTACCCAC                                | 3570 |
|       |      |                                                               |      |
| Sbjct | 3541 | TCAACCCAGCCATGGGATACTACTACCCAC                                | 3570 |

**Table of SNPs and InDels in Os08t0509600-01**

|                   | cds | 5' UTR | 3'UTR | Introns |
|-------------------|-----|--------|-------|---------|
| No. of variants:4 | 0   | 0      | 0     | 4       |
| No. of SNPs: 4    | 0   | 0      | 0     | 4       |
| No.of InDels: 0   | 0   | 0      | 0     | 0       |

**Table S12.** Effect of SNPs in the 2kb upstream region of the gene in IL 50-13

(C4: Os02t0831500-01 (Chr02:35754946..35761216) (+ strand))

| <b>S. No.</b> | <b>Position</b> | <b>SNP change</b> | <b>SNP effect</b> |
|---------------|-----------------|-------------------|-------------------|
| 1             | 35753912        | C-T               | MODIFIER          |
| 2             | 35753931        | T-C               | MODIFIER          |
| 3             | 35753961        | C-T               | MODIFIER          |

### **Supplementary Table legends**

**Table S1.** List of significantly ( $p \leq 0.05$ ) up-regulated and down-regulated genes in flag leaf and panicle of test hybrid compared to control hybrid

**Table S2.** List of DEGs up- and down-regulated in common and exclusive in flag leaf and panicle of control hybrid Vs test hybrid

**Table S3.** DEGs and reported yield related genes considered for analysis to study the differences in the gene sequences between KMR3 and IL50-13. Category A refers to genes within *qyld2.1*, B refers to genes within *qyld8.2*, C refers to genes showing high fold expression and D refers to reported yield related genes.

**Table S4.** Differential expression of genes in flag leaf associated with grain yield and abiotic stress tolerance in test hybrid

**Table S5.** Differential expression of genes in panicle associated with grain yield and abiotic stress tolerance in test hybrid

**Table S6.** Enriched GO terms in flag leaf up-and down-regulated DEGs of test hybrid

**Table S7.** Enriched GO terms in panicle up-and down-regulated DEGs of test hybrid

**Table S8.** The GO terms common between flag leaf and panicle of test hybrid

**Table S9.** List of flag leaf up and down-regulated genes involved metabolisms of test hybrid.

**Table S10.** List of up and down-regulated genes involved metabolisms in panicle of test hybrid.

**Table S11.** Sequences of the 19 genes showing differences between KMR3 and IL50-13.

**Table S12.** Effect of SNPs in the 2kb upstream region of the gene in IL50-13
